# Supplementary material for: Wnt/β-catenin activation by mutually exclusive FBXW11 and CTNNB1 hotspot mutations drives salivary basal cell adenoma
Source: Springer Nature journal article supplement (doi:10.1038/s41467-025-59871-3), 2025-05-19
Supplement: MOESM1 [file 41467_2025_59871_MOESM1_ESM.pdf]

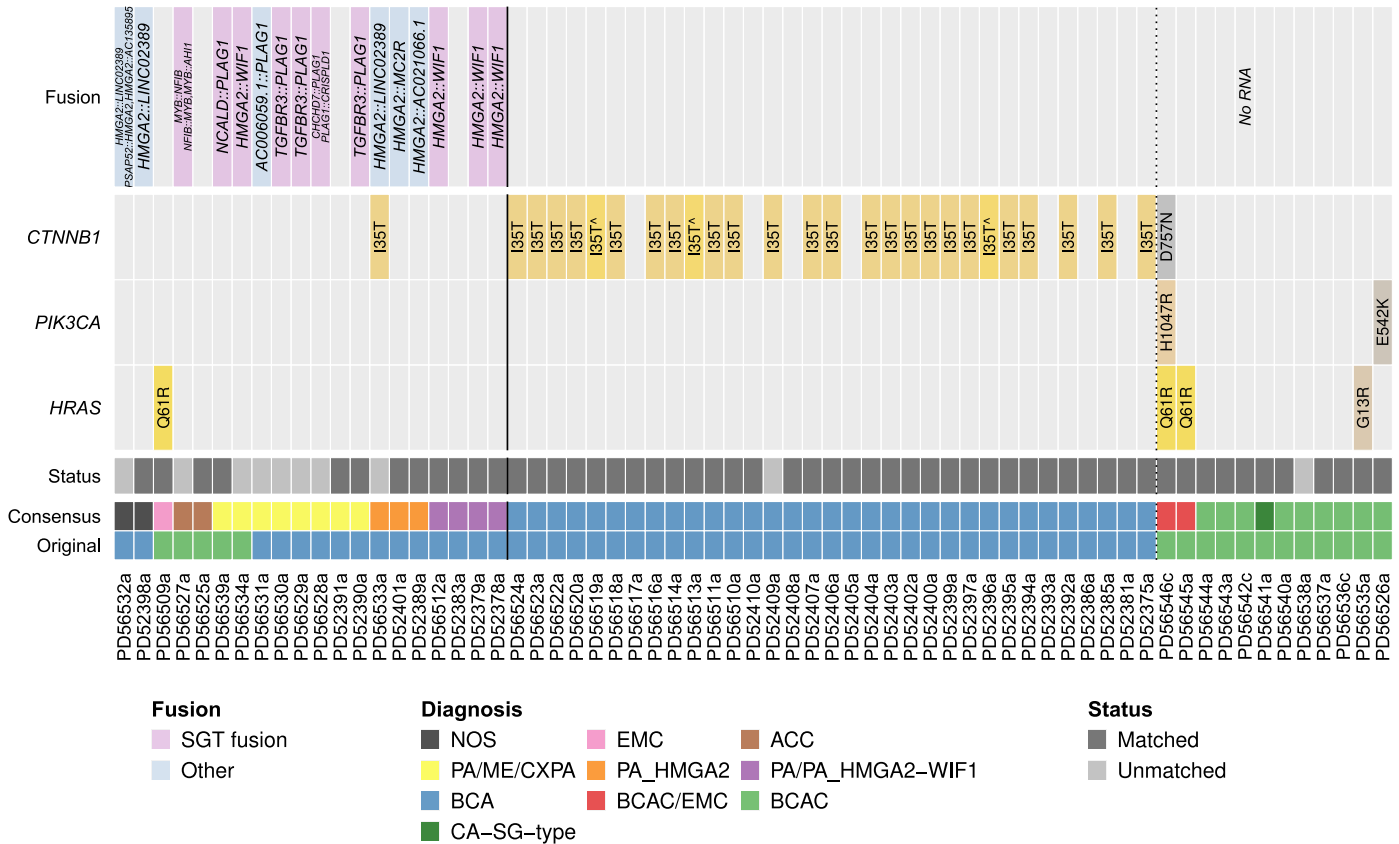

**Supplementary Fig. 1: Review of salivary gland tumours and selected mutations and fusions.** Shown are salivary gland tumours collected for this study that passed quality assurance. Tumours with and without a matched normal sample are included for case review, however, BCAC and BCA cases without a matched normal sample were excluded from the final analysis cohort. Review of cases were based on both histopathology and select somatic mutations and fusion. Fusions shown are those previously identified in salivary gland tumours (SGT fusions) and other fusions involving *HMGA2*, *WIF1*, *NFIB*, *MYB* or *PLAG1*. Exact breakpoints were identified for *MYB::NFIB*, *NFIB::MYB*, *MYB::AHI1* and *HMGA2::WIF1* fusions. Abbreviations: ACC, adenoid cystic carcinoma; EMC, epithelial-myoeplithelial carcinoma; ME, myoeplithelioma; BCA, basal cell adenoma; BCAC, basal cell adenocarcinoma; BCAC/EMC, differential diagnosis of BCAC and EMC; CXPA, carcinoma ex-pleomorphic adenoma; PA/PA\_HMGA2-WIF1, pleomorphic adenoma or pleomorphic adenoma with *HMGA2::WIF1*; PA\_HMGA2, pleomorphic adenoma with a *HMGA2* fusion other than *HMGA2::WIF1*; PA/ME/CXPA, differential diagnosis of PA, ME and CXPA; CA-SG-type, carcinoma of salivary gland type (lung, unknown origin); NOS, salivary gland tumour, not otherwise specified. I35T^ indicates a mutation found by manual inspection of sequencing read alignments. Cases with a consensus BCA, BCAC, BCAC/EMC or CA-SG-type diagnosis and a matched normal sample were taken forward for further analysis.

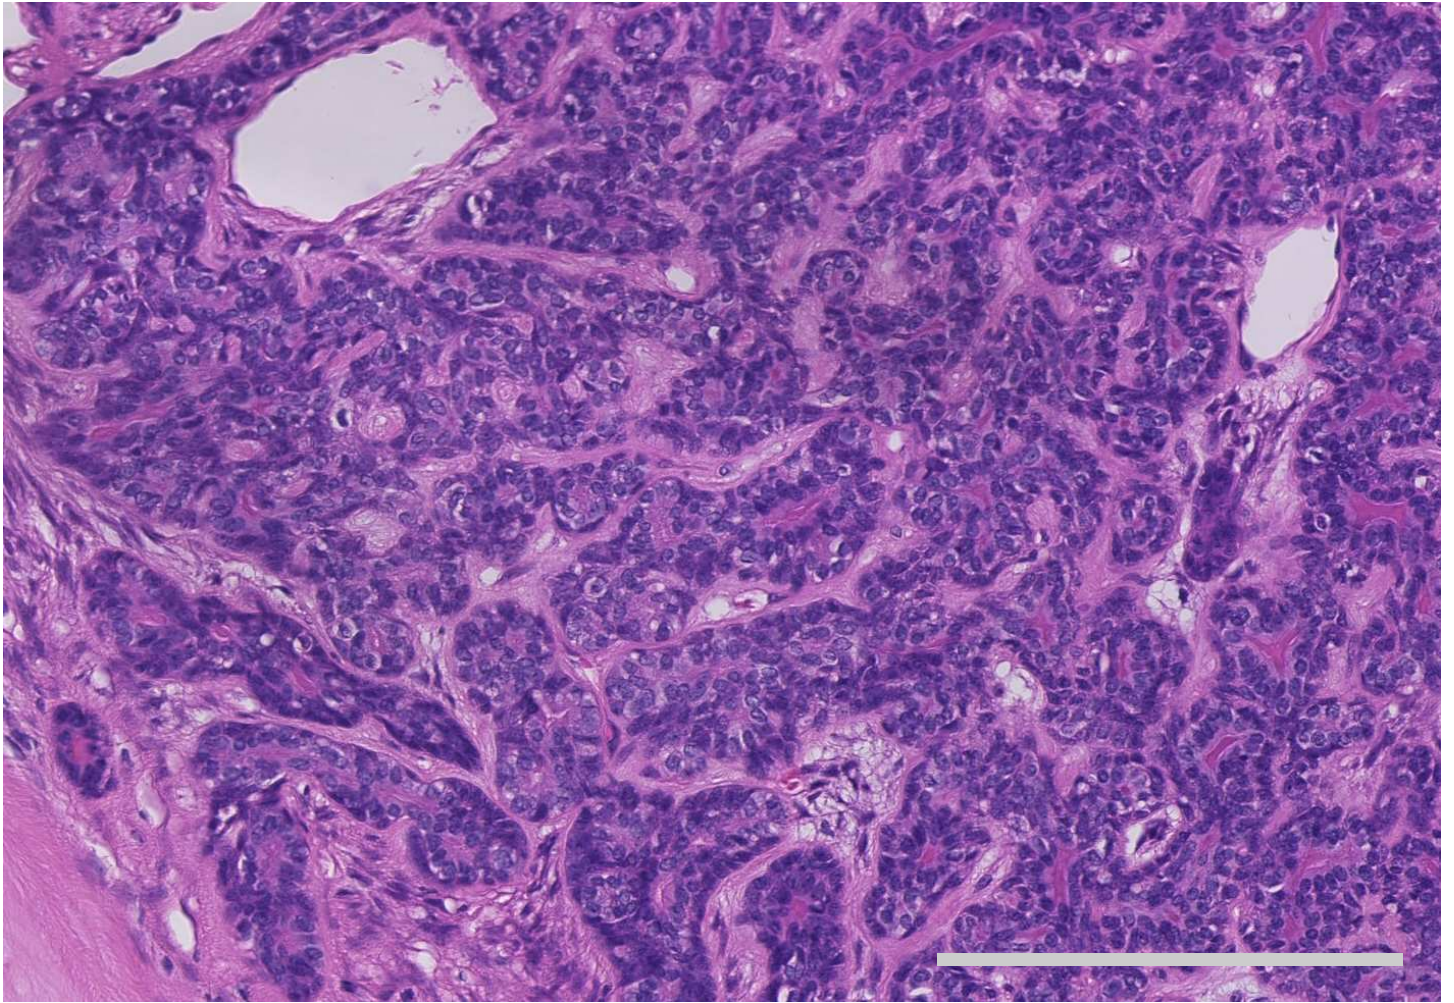

**Supplementary Fig. 2: Hematoxylin and eosin staining of a salivary gland basal cell adenoma.** Basal cell adenoma (PD52375a) with a tubular and trabecular growth pattern of bilayered ducts and minimal intervening cellular stroma. The cells are bland and show no mitotic figures. Scale bar: 200  $\mu\text{m}$ .



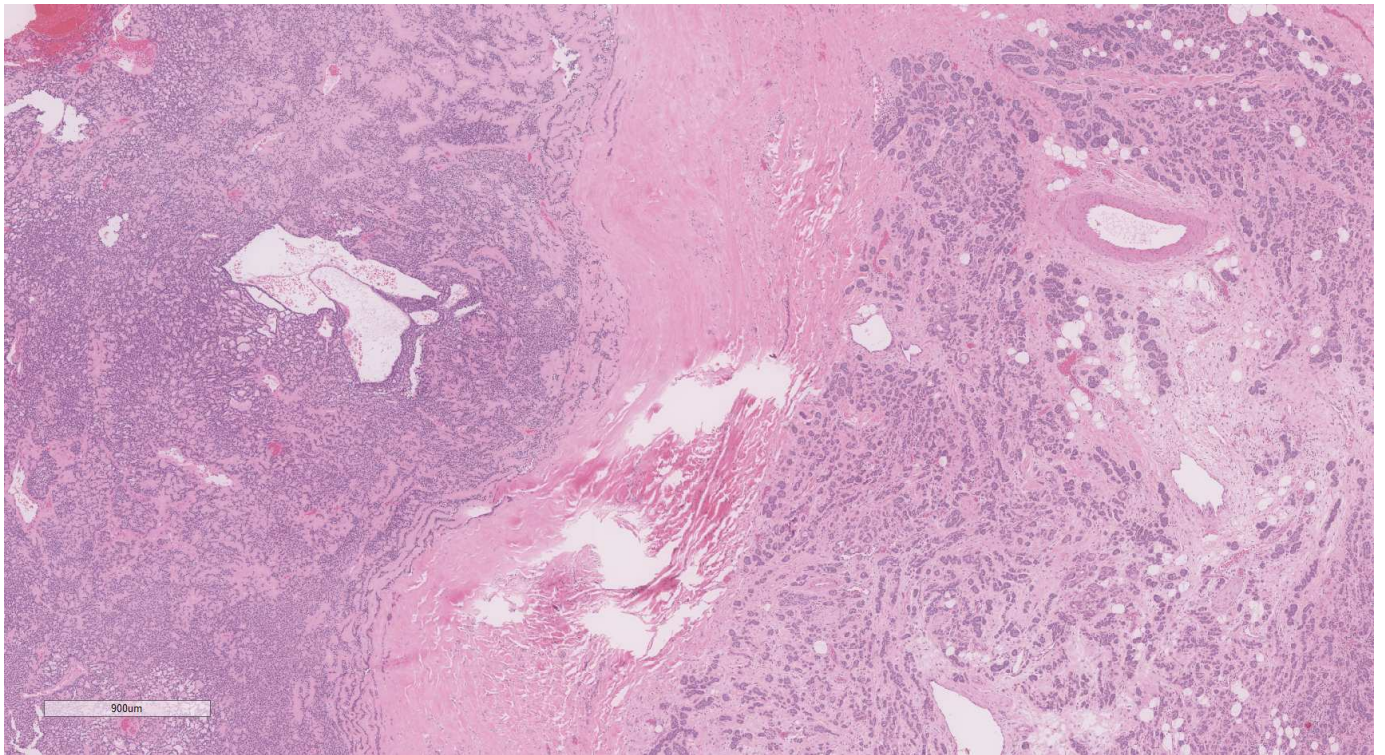

**Supplementary Fig. 3: Hematoxylin and eosin staining of a salivary gland basal cell adenocarcinoma.** The tumour (PD56536c) shows a solid circumscribed nodule on the left and an infiltrative basaloid small nested component on the right which is infiltrating soft tissue.

a

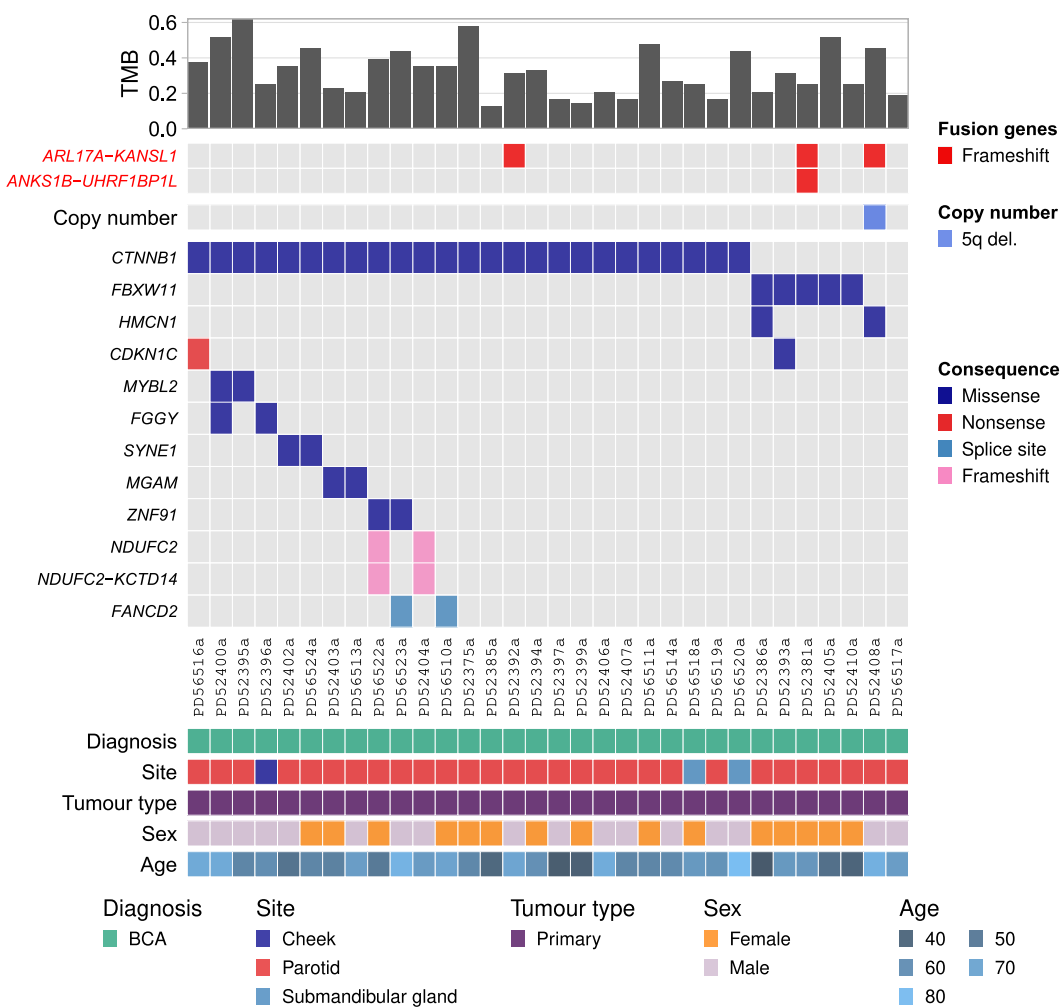

b

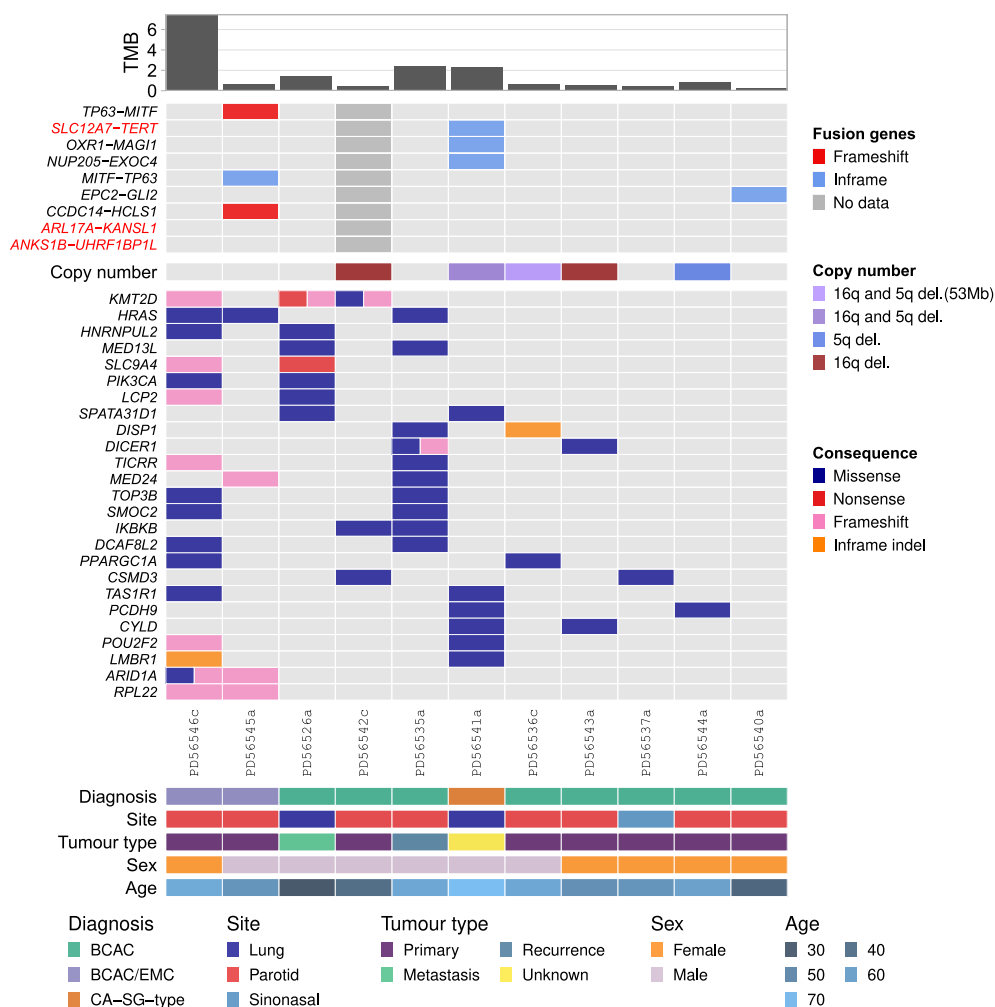

**Supplementary Fig. 4: Recurrently mutated genes in salivary gland basal cell adenoma (BCA) and basal cell adenocarcinoma (BCAC).** Shown are genes with protein-altering mutations in at least 2 samples in (a) BCA and (b) BCAC. Fusions genes in red text indicate fusions found in the Trinity Cancer Transcriptome Analysis Toolkit human fusion library. The copy number panel indicates the tumours that had copy number loss of chromosome arms 5q and/or 16q, which was significant in the BCAC cohort. BCAC/EMC, differential diagnosis of BCAC and epithelial-myoepithelial carcinoma; CA-SG-type, carcinoma of salivary gland type (lung, origin unknown); TMB, tumour mutation burden (mutations/Mb).



a

Ploidy: 4.06, purity: 73%, goodness of fit: 97.7%

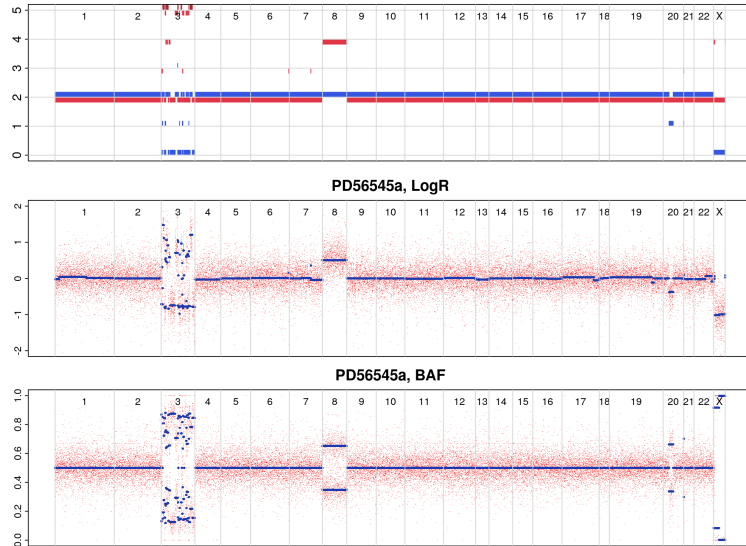

b

Ploidy: 1.84, purity: 74%, goodness of fit: 99.0%

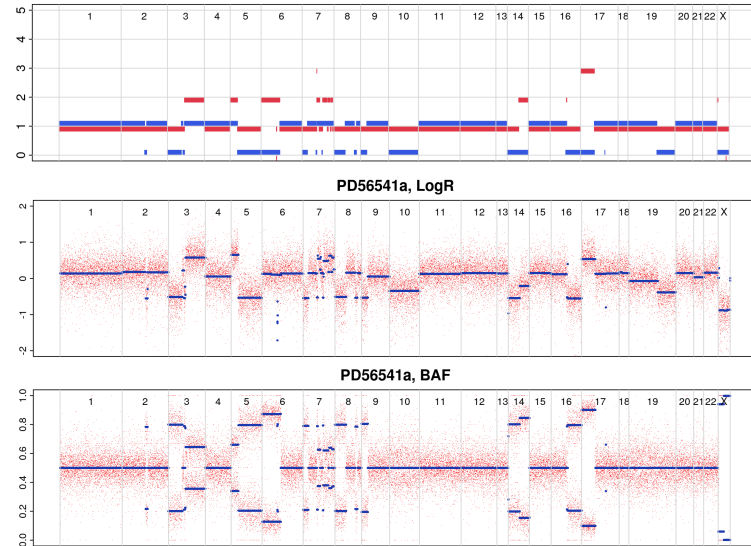

c

Ploidy: 1.95, purity: 74%, goodness of fit: 95.6%

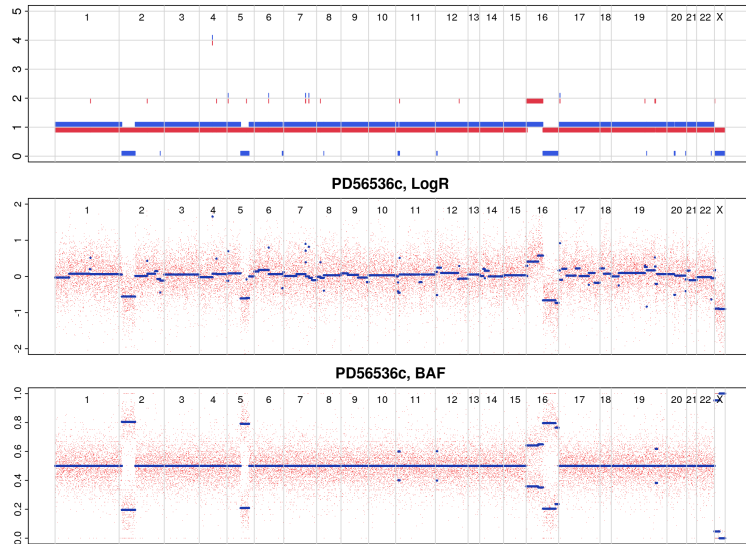

d

Ploidy: 2.07, purity: 40%, goodness of fit: 93.1%

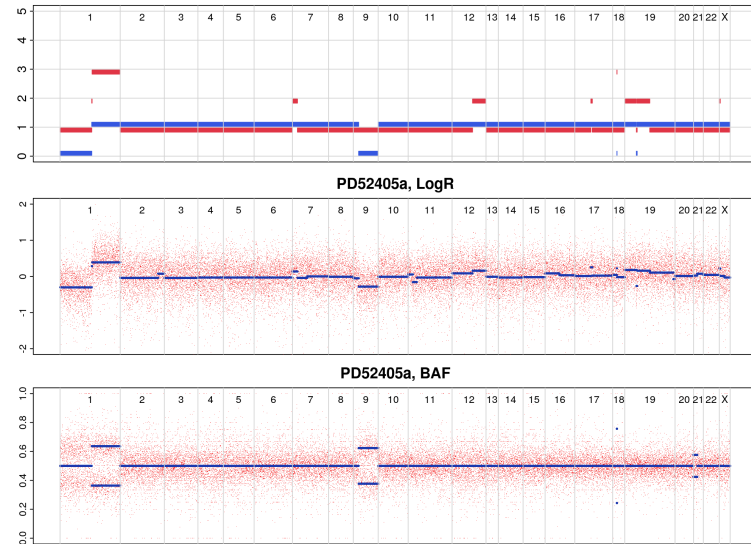

**Supplementary Fig. 5: Somatic copy number alterations in salivary gland basal cell adenoma (BCA) and salivary gland basal cell adenocarcinoma (BCAC).** (a) A chromothripsis-like event was identified on chromosome 3 of PD56545a, a tumour with differential diagnosis of BCAC and epithelial-myoepithelial carcinoma. (b) Examples of copy number alteration in BCAC in samples (b) PD56541a, a salivary gland-type carcinoma of lung (metastasis of unknown primary/lung primary), and (c) PD56536c, a primary tumour from the parotid gland. (d) Copy number alterations in a BCA, PD52405a, from the parotid gland. The top panels show the allele-specific copy number, the middle panels show the log<sub>2</sub> depth ratios and the lower panels show the b-allele frequencies (BAF) in the tumour. Plots were generated by ASCAT (see Methods).

a

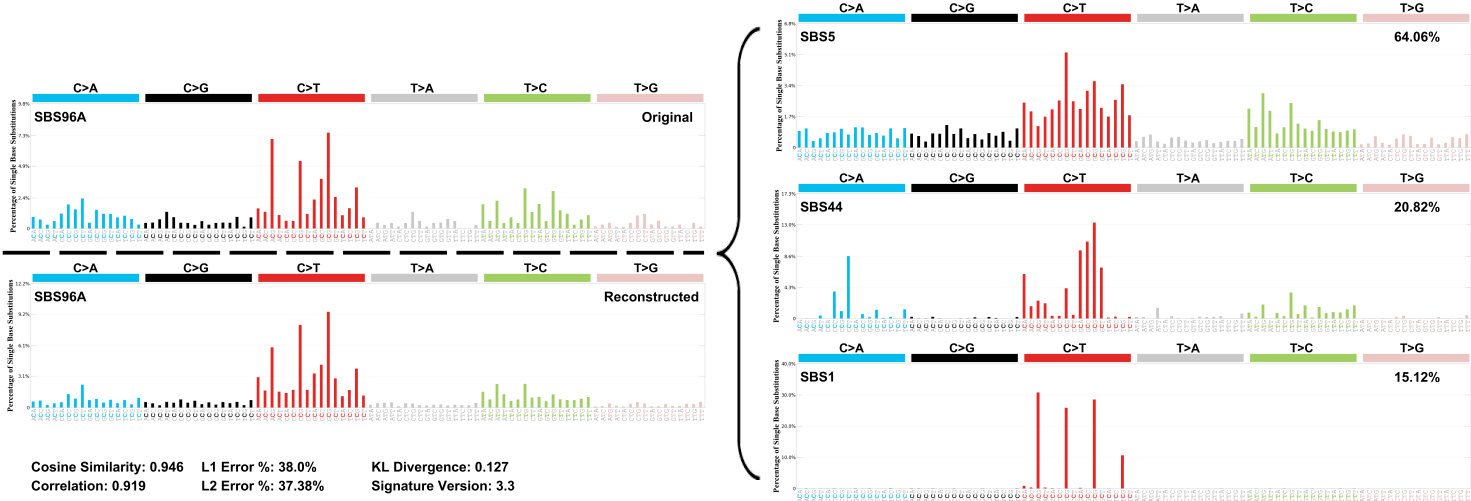

b

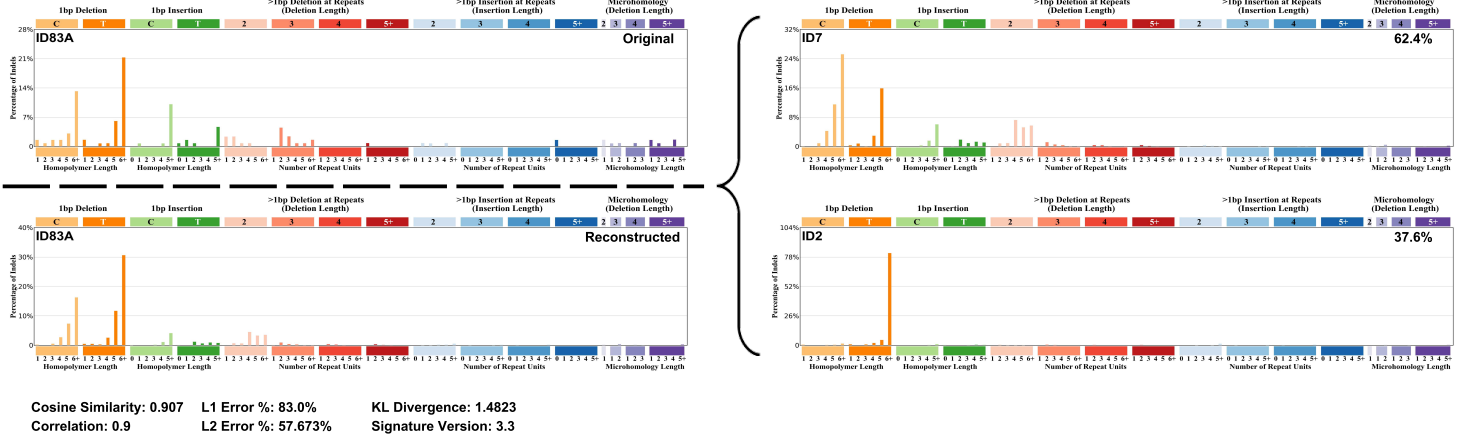

c

| Solution statistics for PD56546c |           |                   |         |           |         |           |               |             |
|----------------------------------|-----------|-------------------|---------|-----------|---------|-----------|---------------|-------------|
| Signature type                   | Mutations | Cosine similarity | L1 norm | L1 Norm % | L2 norm | L2 norm % | KL divergence | Correlation |
| SBS                              | 263       | 0.869             | 164.4   | 62.7      | 35.1    | 62.9      | 0.59          | 0.846       |
| ID                               | 88        | 0.944             | 49.9    | 56.7      | 11.4    | 33.7      | 0.52          | 0.939       |

d

| Signature activities in PD56546c |       |     |     |
|----------------------------------|-------|-----|-----|
| SBS1                             | SBS44 | ID2 | ID7 |
| 62                               | 200   | 34  | 54  |

e

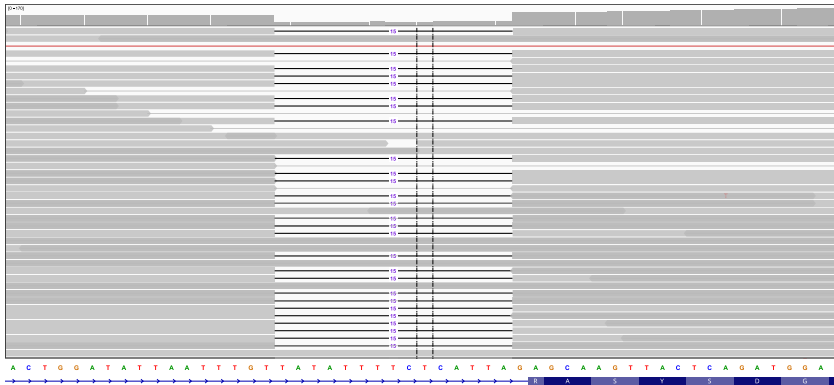

**Supplementary Fig. 6: Decomposition of mutation signatures extracted from a cohort of salivary gland basal cell adenocarcinomas (BCACs).** *De novo* signature extraction identified 1 single base substitution (SBS) signature (SBS96A) and 1 doublet base substitution (DBS) signature (ID83A) in a cohort of 9 BCAC and 2 BCAC with a differential diagnosis of epithelial-myoeptithelial carcinoma (BCAC/EMC). (a) Signature decomposition with COSMIC mutational signatures (v3.3) was performed, identifying SBS1, SBS5 and SBS44 in SBS96A and (b) ID2 and ID7 in ID83A. Reconstructed SBS96A and ID83A signatures had cosine similarities of 0.946 and 0.907 with the original extracted SBS96A and ID83A signatures, respectively. (c) The signature decomposition and assignment statistics for PD56546c. (d) In sample PD56546c, signatures found in tumours with deficient mismatch repair (SBS44, ID2 and ID7) were active. (e) Read alignments from PD56546c showing a 15 bp somatic indel affecting the splice acceptor site in intron 4 of *MLH1* and loss of heterozygosity of chromosome 3p, leading to biallelic inactivation of *MLH1*.



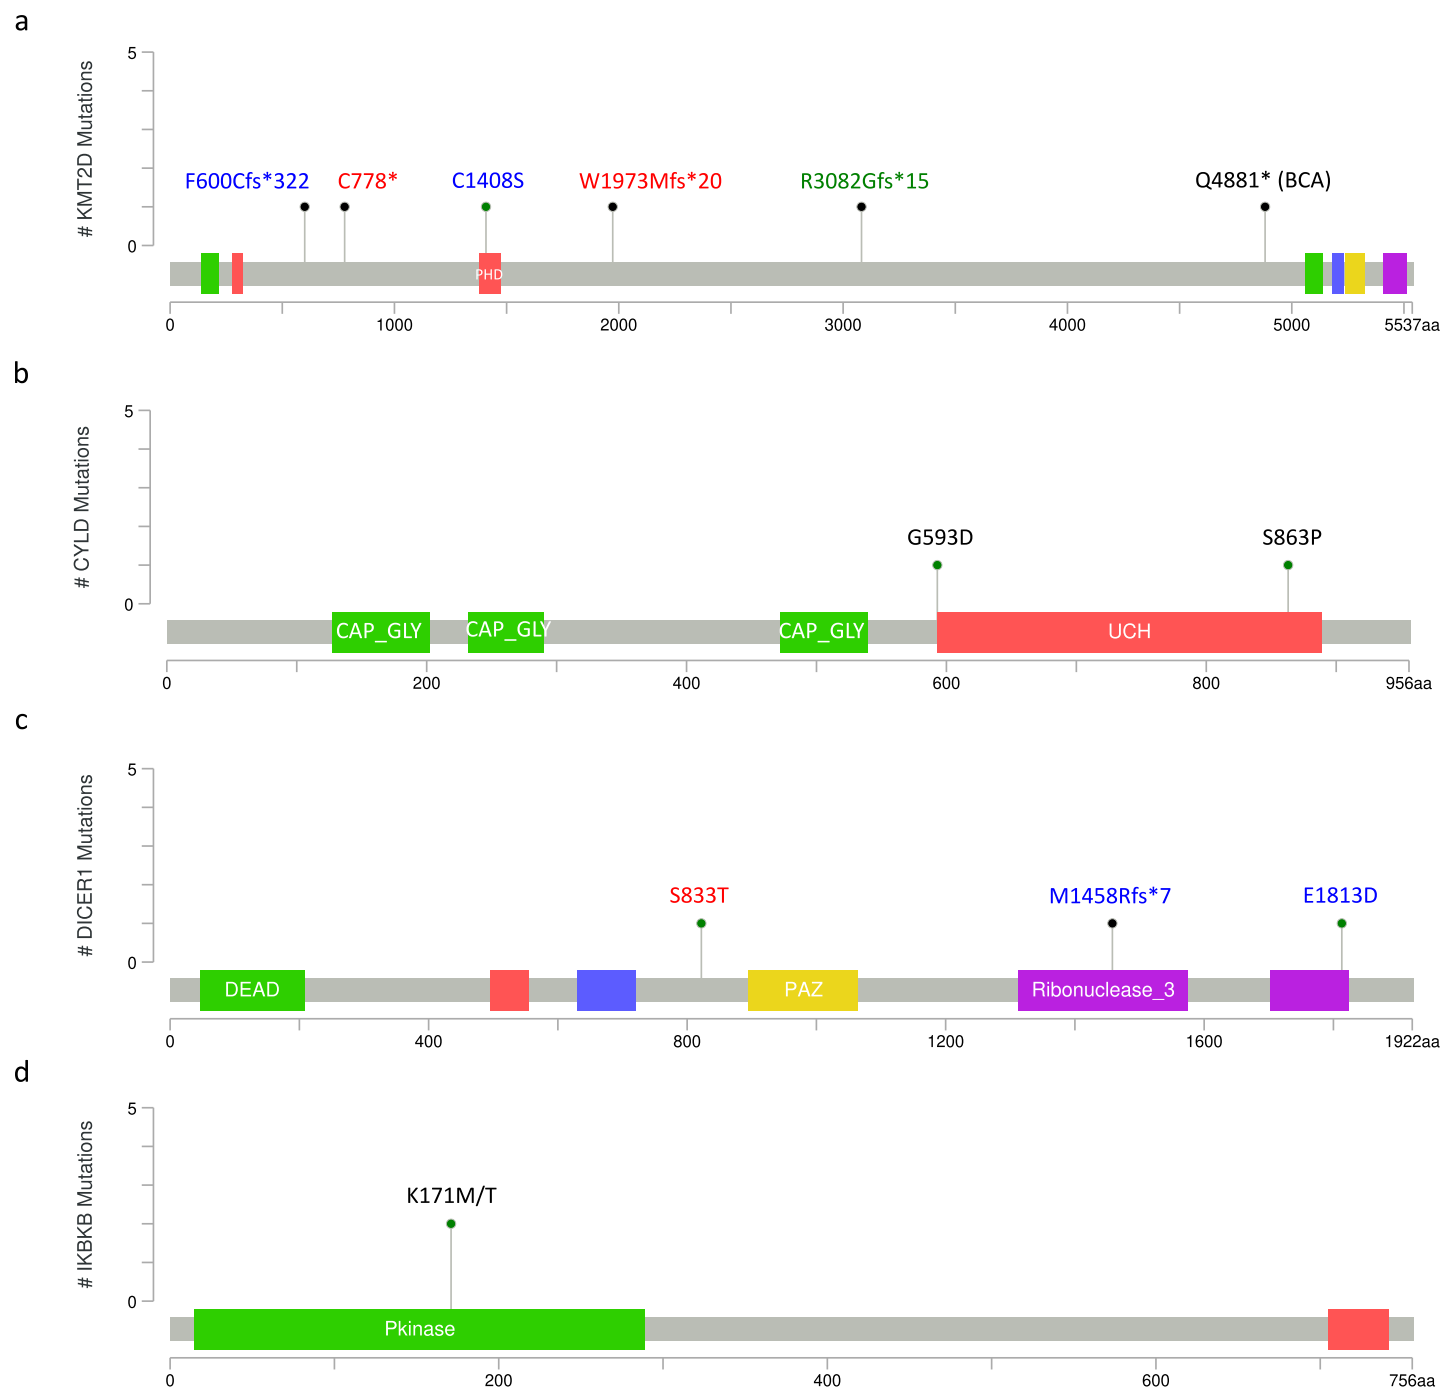

**Supplementary Fig. 7: Location of mutations in select genes in salivary gland basal cell adenocarcinoma.**

Shown are lollipop plot representations of proteins and protein domains. (a) KMT2D mutations in 2 salivary gland basal cell adenocarcinoma (BCAC; red and blue), 1 BCAC with differential diagnosis of epithelial-myoepithelial carcinoma (green) and 1 basal cell adenoma (BCA). Mutations from the same tumour are indicated by colour. PHD is the plant homeodomain finger. (b) Missense mutations in 2 BCACs were located in the ubiquitin carboxyl-terminal hydrolase (UCH) domain of CYLD. (c) DICER1 mutations in 2 BCACs. Mutations from the same tumour are indicated by colour. Purple rectangles represent ribonuclease IIIa (left) and ribonuclease IIIb domains (right). (d) Two BCACs had mutations affecting the same amino acid, p.K171M and p.K171T. Pkinase is the protein kinase domain. Plots were generated using MutationMapper on the cBioPortal website ([https://www.cbioportal.org/mutation\\_mapper](https://www.cbioportal.org/mutation_mapper)).

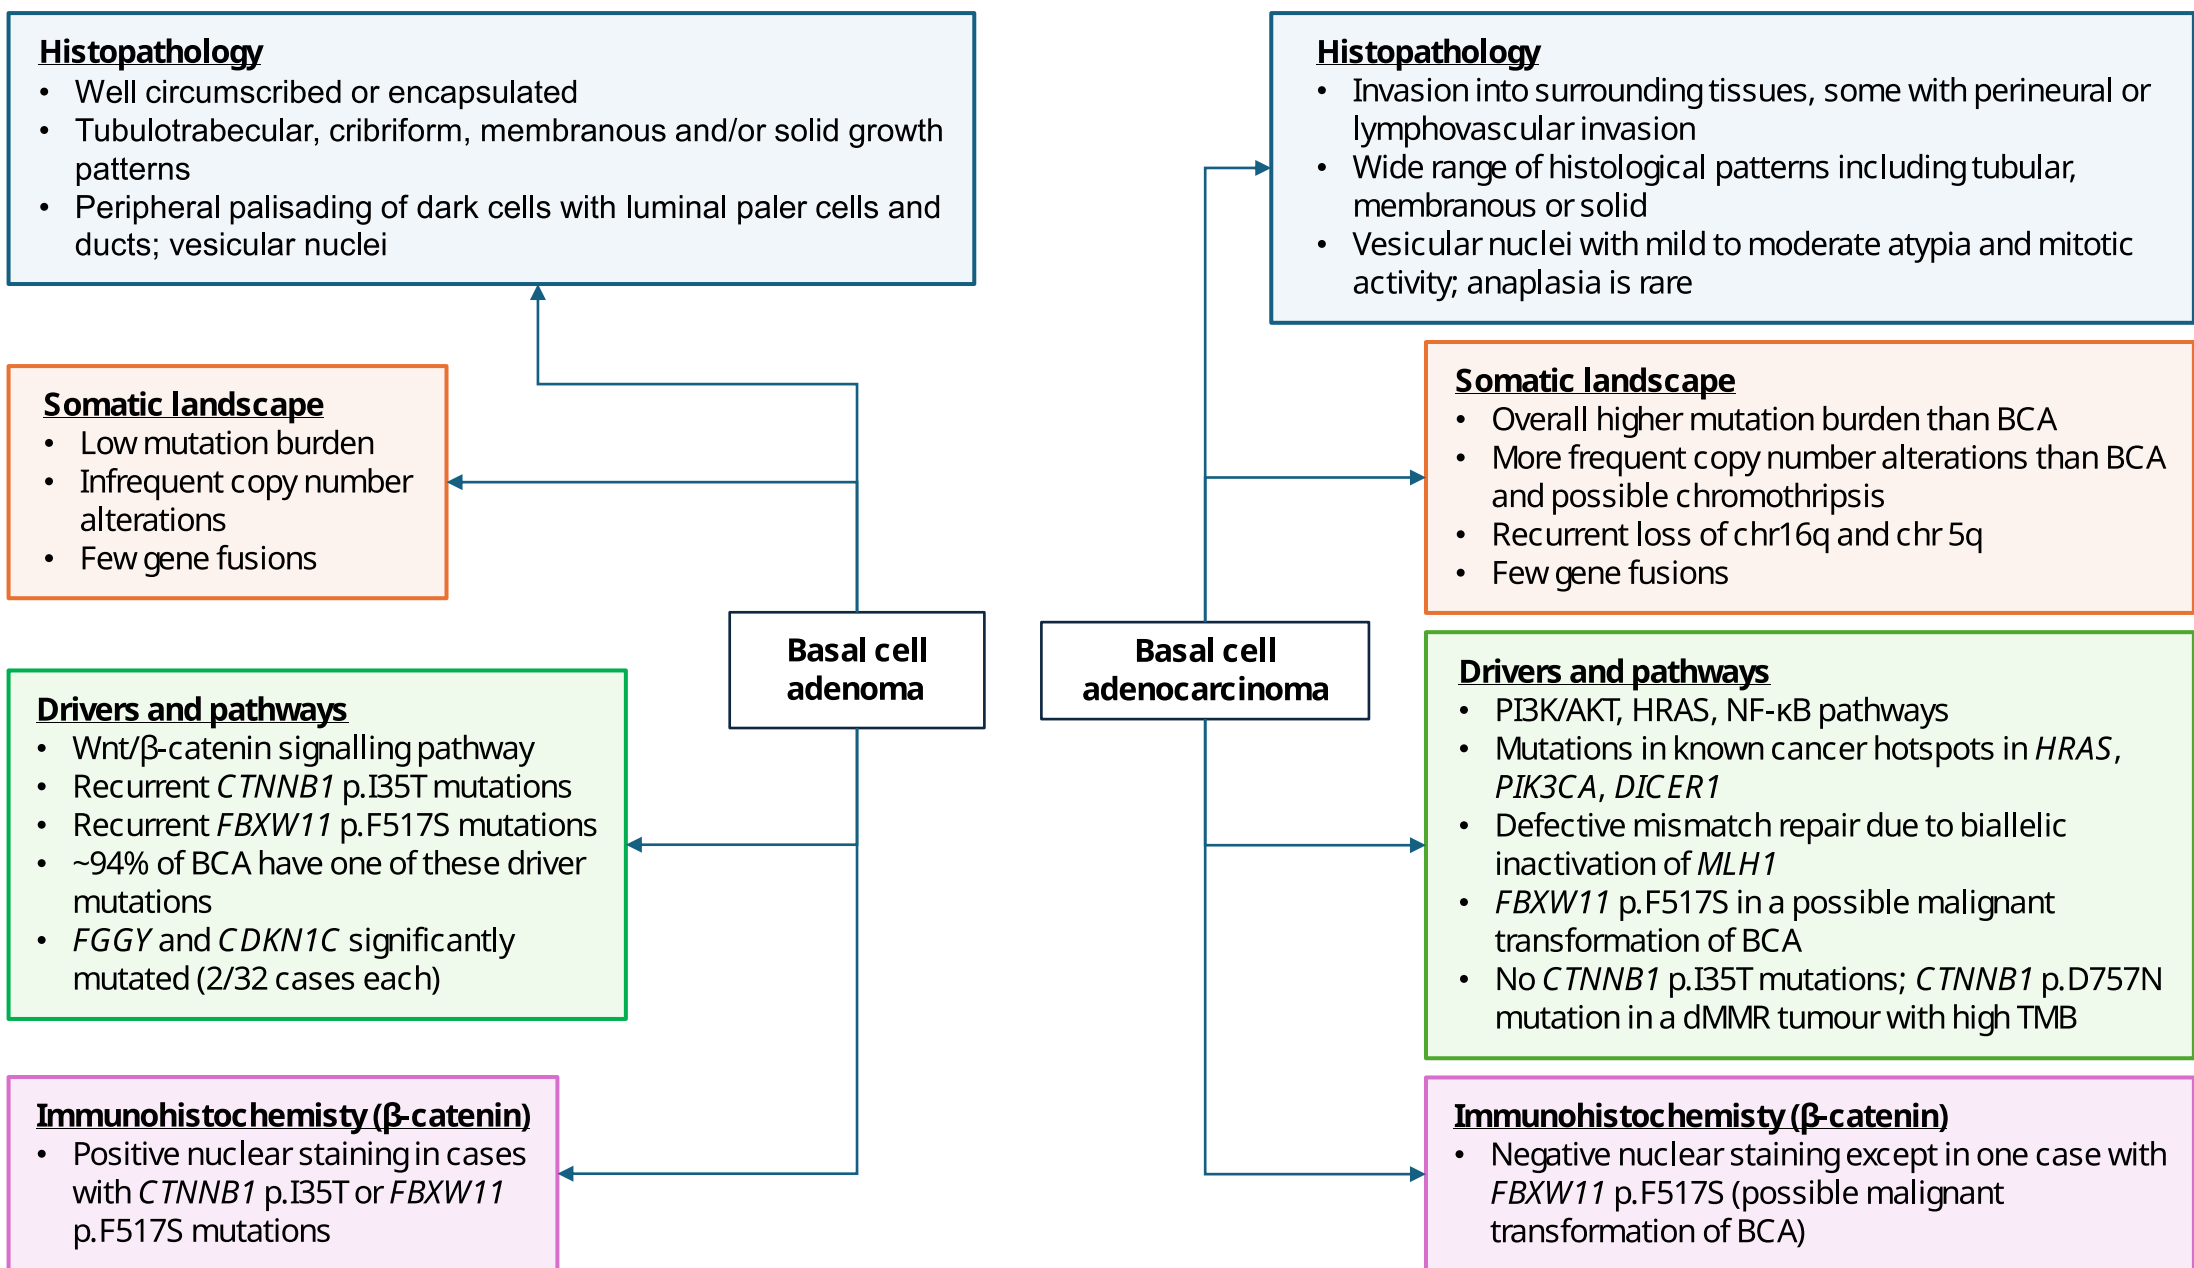

**Supplementary Fig. 8: A comparison of salivary gland basal cell adenoma (BCA) and basal cell adenocarcinoma (BCAC).** Presented are histopathological features of BCA and BCAC and a summary of findings presented in this study. The differences in driver events and affected pathways, and the correlation of positive nuclear staining for β-catenin expression with *CTNNB1* p.I35T and *FBXW11* p.F517S mutation can be used to inform the differential diagnosis between these tumours, which share some histopathological features, and provide more effective patient care.



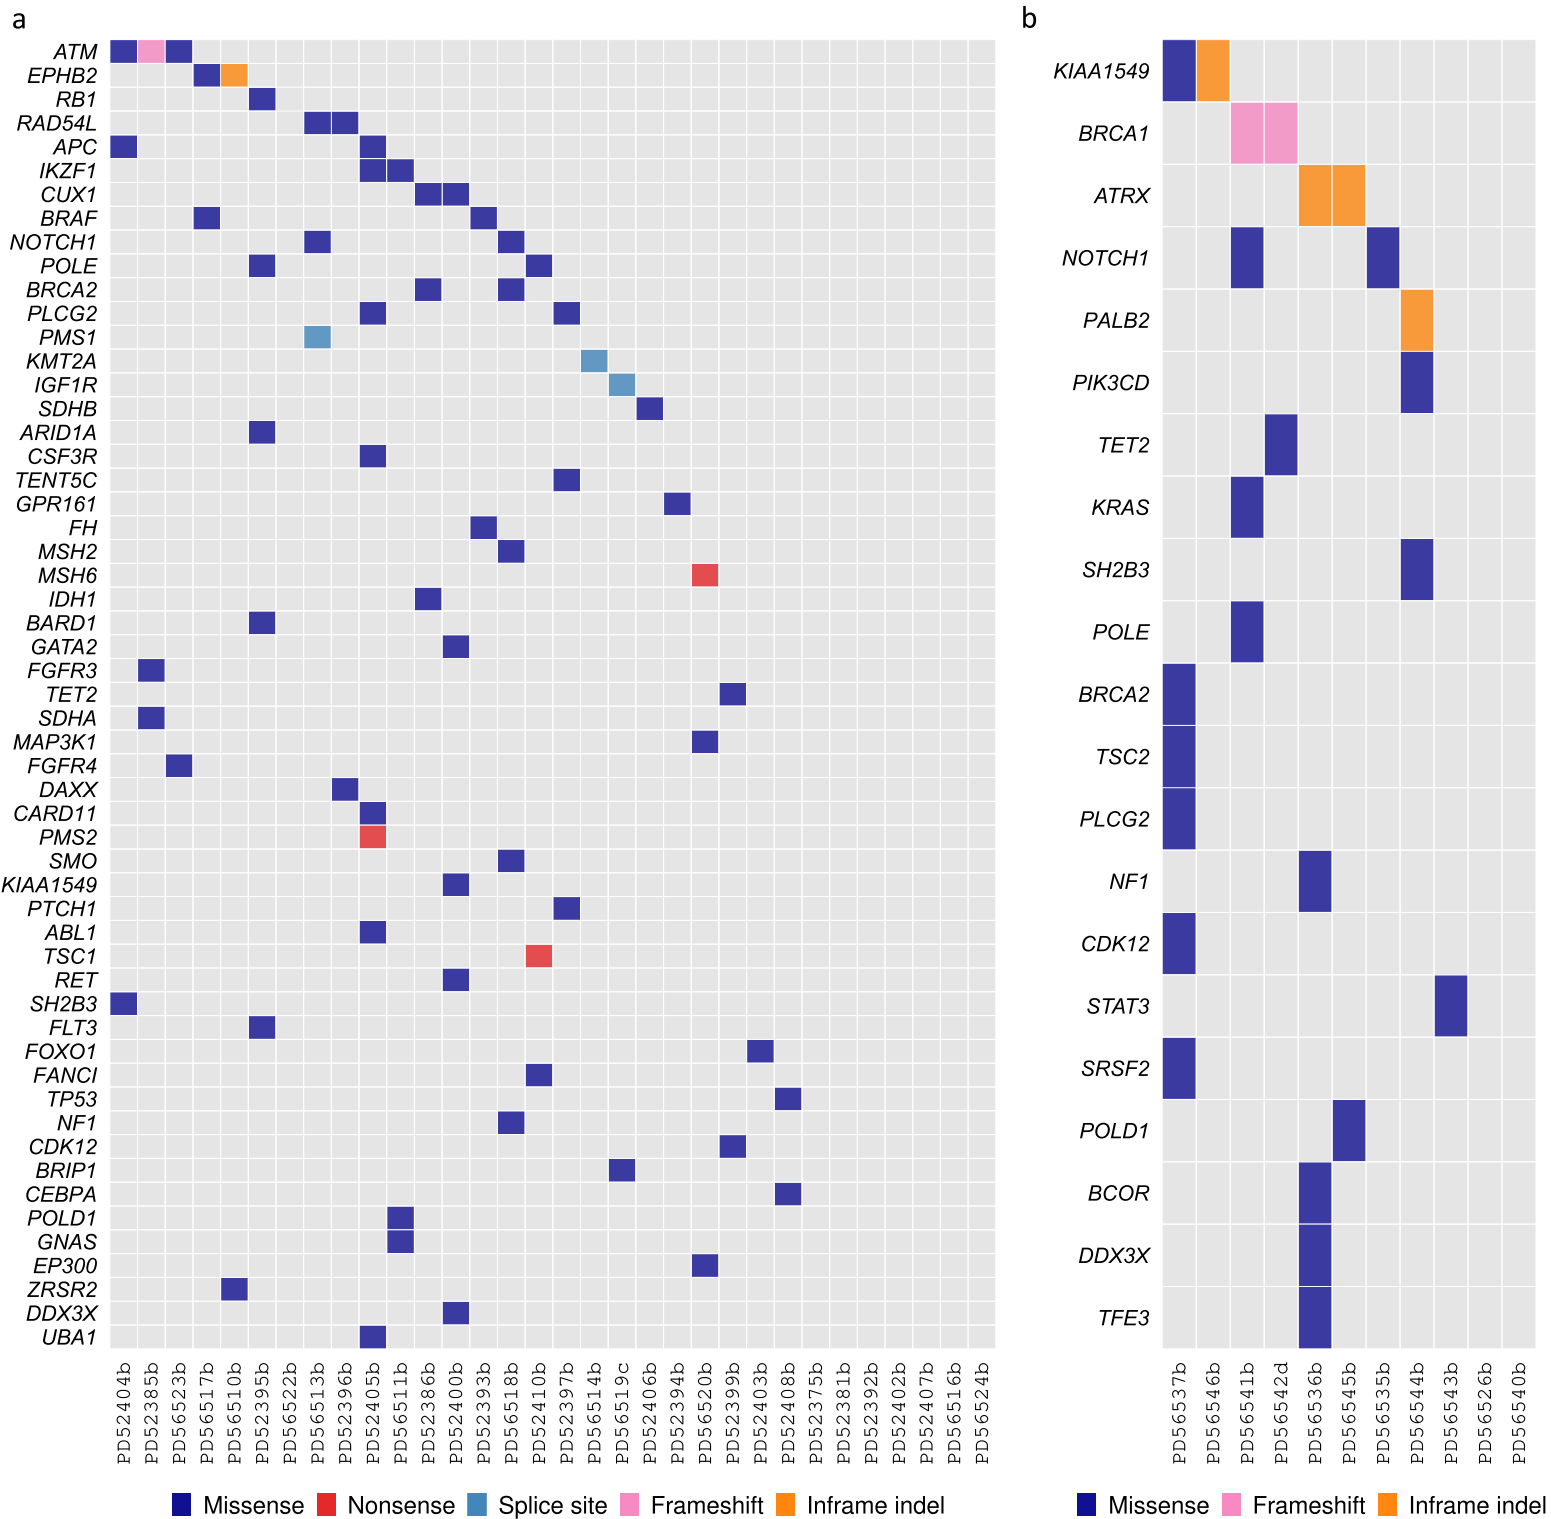

**Supplementary Fig. 9: Germline variants in salivary gland basal cell adenoma (BCA) and basal cell adenocarcinoma (BCAC).** Shown are protein-altering germline variants in (a) BCA and (b) BCAC. Genes shown are those included in the National Health Service England's National Genomic Test Directory for somatic and inherited cancers (v7.2) that were either not found in the gnomAD database (v3.1) or present with an overall population frequency < 0.0001. Variants annotated in the ClinVar database (20230121) as benign or likely benign are not shown.

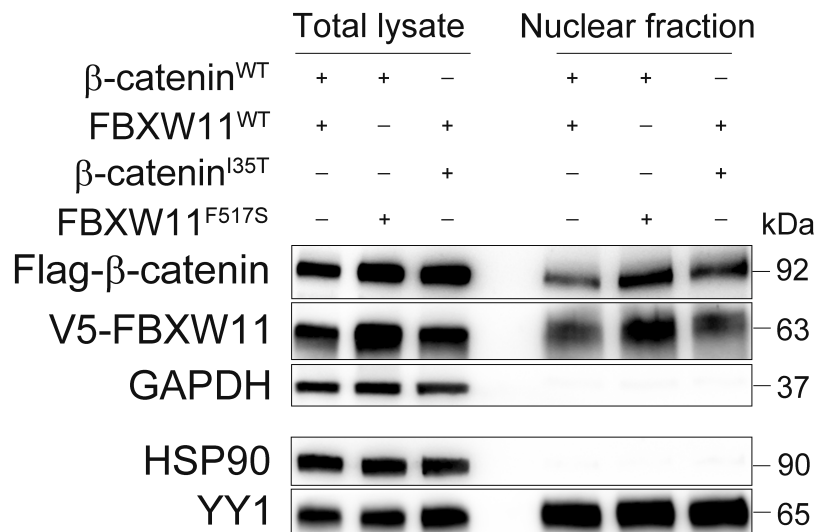

**Supplementary Fig. 10: Increased nuclear levels of  $\beta$ -catenin in cells overexpressing FBXW11<sup>F517S</sup> or  $\beta$ -catenin<sup>I35T</sup>.** The nuclear expression of  $\beta$ -catenin and FBXW11 proteins in serum-starved COS-1 cells was assessed by cell fractionation experiments (three biological replicates). Levels of the ectopically expressed Flag-tagged  $\beta$ -catenin and V5-tagged FBXW11 proteins in the respective whole cell lysates are also reported. HSP90 (as cytoplasmic marker) was used to verify the absence of cytoplasm contamination in the extracted nuclear fraction, while YY1 (as nuclear marker) and GAPDH (total lysate) were used as loading controls.



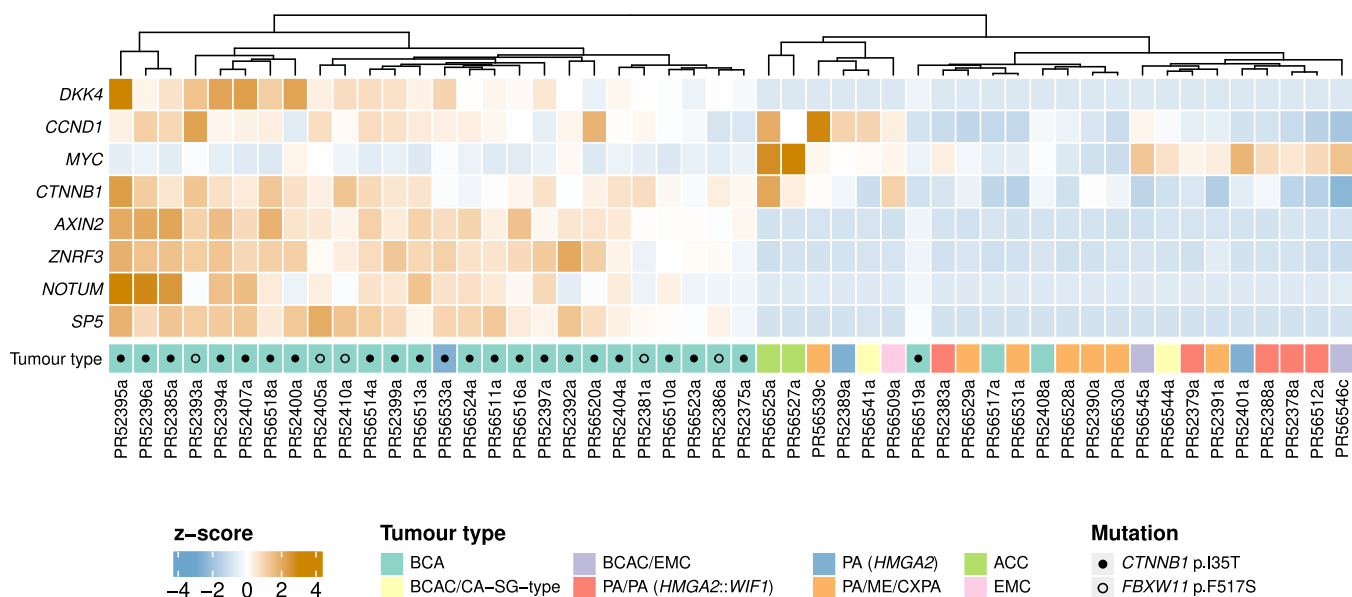

**Supplementary Fig. 11: Heatmap of RNA sequencing expression z-scores in salivary gland tumours.** Z-score normalisation was performed on read counts (expressed as transcripts per million; TPM) from RNA sequencing. Complete linkage hierarchical clustering of z-scores using Euclidean distance was performed on the Wnt/ $\beta$ -catenin target genes shown. Only samples that pass quality assurance requirements are shown (see Methods). Abbreviations: ACC, adenoid cystic carcinoma; EMC, epithelial myoepithelial carcinoma; ME, myoepithelioma; BCA, basal cell adenoma; BCAC/CA-SG-type, basal cell adenocarcinoma (PR56544a) or carcinoma of salivary gland type (PR56541a); BCAC/EMC, differential diagnosis of BCAC and EMC; CXPA, carcinoma ex-pleomorphic adenoma; PA/PA (*HMGA2::WIF1*), pleomorphic adenoma or pleomorphic adenoma with *HMGA2::WIF1*; PA (*HMGA2*), pleomorphic adenoma with a *HMGA2* fusion other than *HMGA2::WIF1*; PA/ME/CXPA, differential diagnosis of PA, ME and CXPA. For each RNA sample, the matched sample from DNA sequencing is annotated with the prefix "PD" instead of "PR". Source data are provided as a Source Data file.

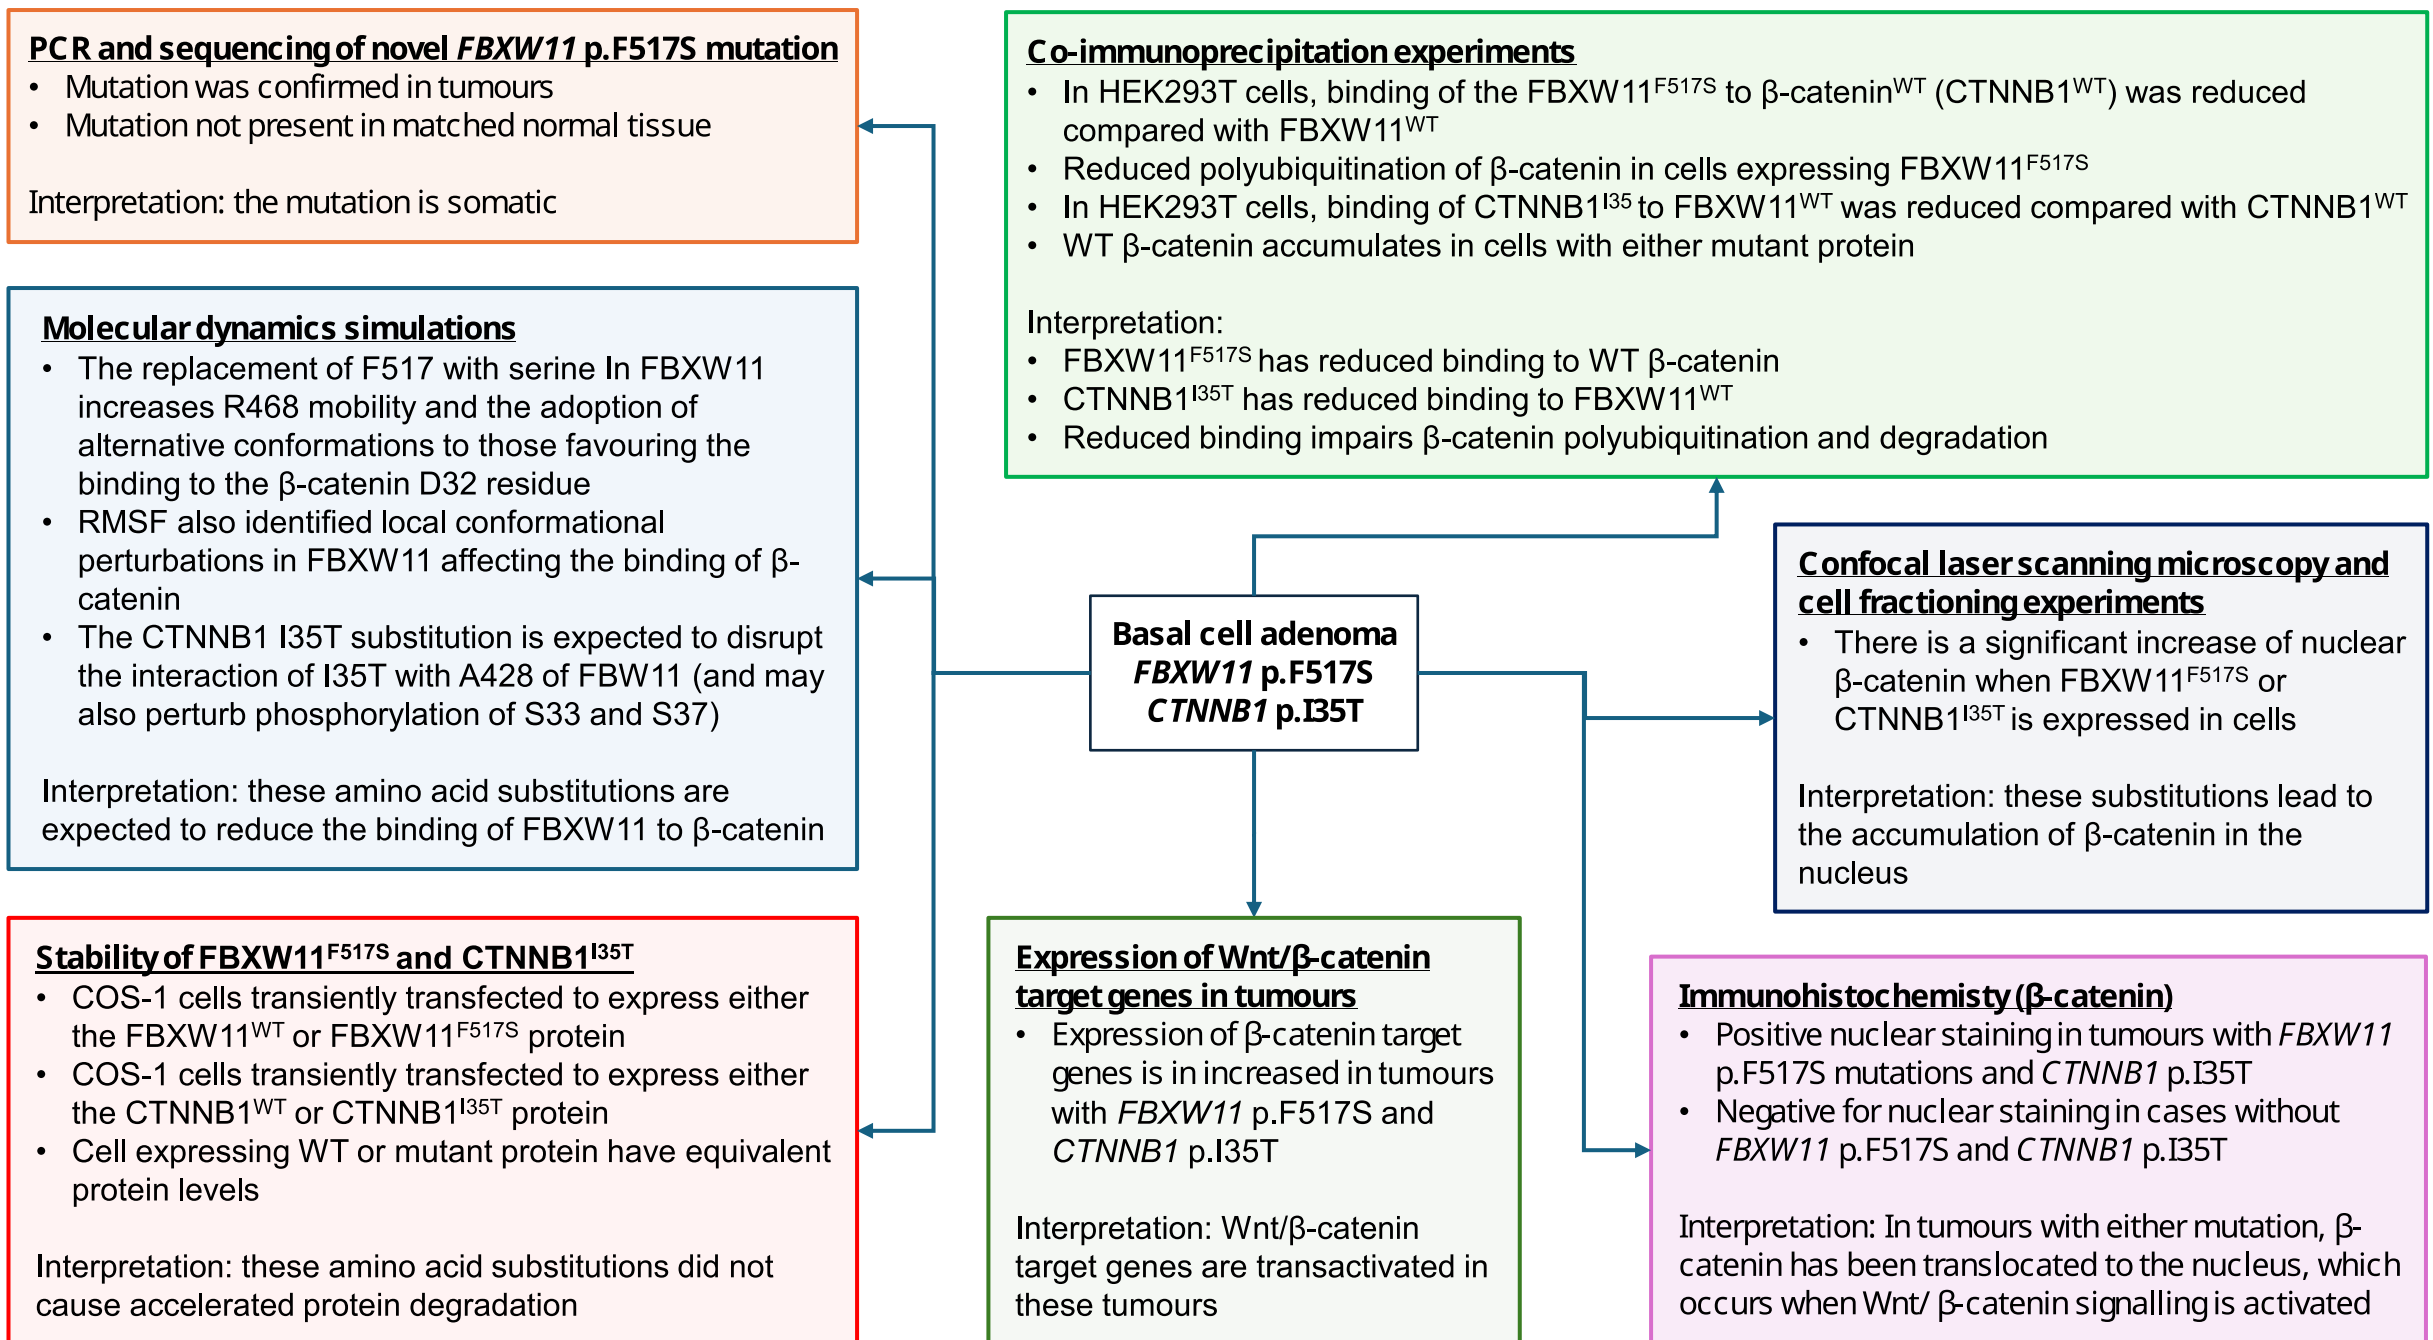

**Supplementary Fig. 12: A schematic summary of experiments performed in this study.** In tumours, we have confirmed that the novel *FBXW11* p.F517S hotspot mutation is somatic, tumours with this mutation and *CTNNB1* p.I35T were positive for nuclear staining for  $\beta$ -catenin and Wnt/ $\beta$ -catenin gene targets were transactivated. *In vitro*, we showed that the mutant proteins were stable, both mutations lead to reduced binding of *FBXW11* to  $\beta$ -catenin and accumulation of  $\beta$ -catenin in the nucleus.



**Supplementary Table 1: Salivary gland basal cell adenoma (BCA) and basal cell adenocarcinoma (BCAC) tumour mutation burden.** Mutation rates (mutations/Mb) were calculated from the BCA and BCAC cohorts, primary BCAC only, recurrent (rec), metastatic (met) and unknown origin (un) cases only and all BCAC, excluding BCAC with differential diagnosis of EMC (BCAC/EMC). Source data are provided as a Source Data file.

| <b>Mutation rate<br/>(mutations/Mb)</b> | <b>BCA</b> | <b>BCAC (all)</b> | <b>BCAC<br/>(primary)</b> | <b>BCAC<br/>(rec/met/un)</b> | <b>BCAC<br/>(excluding<br/>BCAC/EMC)</b> |
|-----------------------------------------|------------|-------------------|---------------------------|------------------------------|------------------------------------------|
| Samples                                 | 32         | 11                | 8                         | 3                            | 9                                        |
| Mean                                    | 0.32       | 1.59              | 1.42                      | 2.05                         | 1.04                                     |
| Median                                  | 0.31       | 0.68              | 0.61                      | 2.30                         | 0.66                                     |
| Range                                   | 0.12-0.62  | 0.22-7.48         | 0.22-7.48                 | 1.45-2.38                    | 0.22-2.38                                |

**Supplementary Table 2: Significantly mutated genes in salivary gland basal cell adenoma and basal cell adenocarcinoma. (a)** The `dndscv` algorithm (see Methods) was used to identify significantly mutated genes in salivary gland basal cell adenoma (BCA) and basal cell adenocarcinoma (BCAC) cohorts. Shown are genes with  $q$ -values  $< 0.1$  (significant values in bold) when considering substitutions only, indels only, and substitutions and indels together (global  $q$ -value). All  $q$ -values were obtained using the Benjamini-Hochberg multiple testing correction. Samples in the number of samples with at least one or more mutations in a given gene and COSMIC CGC gene indicates whether a gene is found in the Cancer Gene Census list.

| Gene                 | Cohort | Substitution $q$ -value | Indel $q$ -value | Global $q$ -value | COSMIC CGC gene |
|----------------------|--------|-------------------------|------------------|-------------------|-----------------|
| <b><i>CTNNB1</i></b> | BCA    | <b>0</b>                | 1.0              | 0                 | Y               |
| <b><i>FBXW11</i></b> | BCA    | <b>1.7e-06</b>          | 1                | <b>4.0e-05</b>    | N               |
| <b><i>KMT2D</i></b>  | BCAC   | 1.0                     | <b>0.028</b>     | <b>0.012</b>      | Y               |
| <b><i>HRAS</i></b>   | BCAC   | <b>0.012</b>            | 1.0              | <b>0.09</b>       | Y               |
| <b><i>RPL22</i></b>  | BCAC   | 1.0                     | <b>0.028</b>     | 0.25              | Y               |

**(b)** The `oncdrioveFML` algorithm (see Methods) was used to identify significantly mutated genes in salivary gland basal cell adenoma BCA and BCAC cohorts. Shown are genes with  $q$ -values  $< 0.1$  and mutated in  $>1$  sample. All  $q$ -values were obtained using the Benjamini-Hochberg multiple testing correction. Samples in the number of samples with at least one or more mutations in a given gene and COSMIC CGC gene indicates whether a gene is found in the Cancer Gene Census list. COSMIC v97 was used.

| Gene          | Cohort | Samples | $q$ -value | COSMIC CGC gene |
|---------------|--------|---------|------------|-----------------|
| <i>CTNNB1</i> | BCA    | 25      | 1.6e-05    | Y               |
| <i>FBXW11</i> | BCA    | 5       | 0.011      | N               |
| <i>CDKN1C</i> | BCA    | 2       | 0.087      | N               |
| <i>FGGY</i>   | BCA    | 2       | 0.087      | N               |
| <i>CYLD</i>   | BCAC   | 2       | 0.036      | Y               |
| <i>IKBKB</i>  | BCAC   | 2       | 0.052      | Y               |
| <i>PIK3CA</i> | BCAC   | 2       | 0.077      | Y               |

**Supplementary Table 3: Sanger sequencing validation of a recurrent *FBXW11* mutation.**

PCR amplification, shotgun cloning, and Sanger sequencing of both tumour and matched normal samples, where available, was performed to validate a recurrent mutation in exon 13 of *FBXW11* on chromosome 5 at position 171868777 (A>G; reference genome GRCh38) (c.1550T>C or p.F517S on transcript ENST00000517395.6 and protein ENSP00000428753.2, respectively). The mutation was present in 14-60% of tumour clones sequenced ( $n = 10$ -15 clones per sample) in 4 BCAs and 1 BCAC with the mutation and absent in the 3 matched normal samples for which we had DNA stocks ( $n = 6$ -14 clones per sample), which indicated that the mutation was indeed present and somatic. Additionally, the p.I526M mutation in sample PD52393a was also validated (Figure 3). Validation was not performed for the 6th BCA case, PD52381a, due to a lack of DNA stocks; however, the mutation was present in the transcriptome of this sample.

| Sample   | Tissue type | Clones with mutation (%) |
|----------|-------------|--------------------------|
| PD52386a | Tumour      | 6/14 (42.9%)             |
| PD52386b | Normal      | 0/8 (0.0%)               |
| PD52393a | Tumour      | 6/10 (60.0%)             |
| PD52393b | Normal      | 0/14 (0.0%)              |
| PD52405a | Tumour      | 2/14 (14.2%)             |
| PD52405b | Normal      | 0/6 (0.0%)               |
| PD52410a | Tumour      | 5/15 (33.3%)             |
| PD56543a | Tumour      | 4/15 (26.7%)             |

**Supplementary Table 4: Genes in the Wnt signaling pathway.** Somatic variant lists from the salivary gland basal cell adenoma and basal cell adenocarcinoma cohorts were queried for mutations in the genes listed below, which are part of the Wnt/ $\beta$ -catenin signalling pathway.

| Gene                            | Hugo Symbol (Ensembl v103) |
|---------------------------------|----------------------------|
| <i>Axin1</i>                    | <i>AXIN1</i>               |
| <i>Axin2</i>                    | <i>AXIN2</i>               |
| <i>APC</i>                      | <i>APC</i>                 |
| <i>CDK14</i>                    | <i>CDK14</i>               |
| <i>RNF43</i>                    | <i>RNF43</i>               |
| <i>ZNRF3</i>                    | <i>ZNRF3</i>               |
| <i>YAP</i>                      | <i>YAP1</i>                |
| <i>TAZ</i>                      | <i>WWTR1</i>               |
| <i>GSK3-<math>\beta</math></i>  | <i>GSK3B</i>               |
| <i>CK1-<math>\alpha</math></i>  | <i>CSNK1A1</i>             |
| <i>CTNNB1</i>                   | <i>CTNNB1</i>              |
| <i><math>\beta</math>-TrCP</i>  | <i>BTRC</i>                |
| <i>LRP5</i>                     | <i>LRP5</i>                |
| <i>LRP6</i>                     | <i>LRP6</i>                |
| <i>Dvl1</i>                     | <i>DVL1</i>                |
| <i>Dvl2</i>                     | <i>DVL2</i>                |
| <i>Dvl3</i>                     | <i>DVL3</i>                |
| <i>CBP</i>                      | <i>CRBBP</i>               |
| <i>p300</i>                     | <i>EP300</i>               |
| <i>BRG1</i>                     | <i>SMARCA4</i>             |
| <i>BCL9</i>                     | <i>BCL9</i>                |
| <i>Pygo1</i>                    | <i>PYGO1</i>               |
| <i>Pygo2</i>                    | <i>PYGO2</i>               |
| <i>FBXW7</i>                    | <i>FBXW7</i>               |
| <i><math>\beta</math>-TrCP2</i> | <i>FBXW11</i>              |



**Supplementary Table 5: Significant recurrent copy number alterations.** Shown are significant focal and broad somatic copy number alterations (SCNAs) from *GISTIC2* analysis (see Methods), with residual *q*-value < 0.1 (Benjamini-Hochberg method). Significant focal SCNAs were compared to the Genome in a Bottle (GIAB) consortium's difficult regions benchmarking set and removed from analysis if the fraction of overlap with difficult regions was  $\geq 0.4$ . Finally, for each sample with an amplification or deletion in a significant SCNA, *ASCAT* copy number calls were evaluated for concordance (see Methods). Any *GISTIC2* SNCA was rejected if there was less than 75% concordance with *ASCAT* calls. The number of samples included in the *GISTIC2* analysis was 32 and 11 for the BCA and BCAC cohorts, respectively. CGC, COSMIC Cancer Gene Census; TSG, tumour suppressor gene; N/A, not applicable. Source data are provided as a Source Data file.

| Cohort | Chromosome region                  | Amplification or deletion | Residual <i>q</i> -value | Comment                                                                                       | Fraction overlap with difficult regions | Concordance with <i>ASCAT</i> , % (Samples in agreement) |
|--------|------------------------------------|---------------------------|--------------------------|-----------------------------------------------------------------------------------------------|-----------------------------------------|----------------------------------------------------------|
| BCA    | chr14:22088606-22506783 (0.42 Mb)  | Amp                       | 0.022                    | <i>TRA/TRD</i> locus                                                                          | 0.10                                    | 100 (4/4)                                                |
| BCA    | chr5:140675698-141526846 (0.85 Mb) | Del                       | 0.0048                   | Protocadherin- $\beta$ gene cluster                                                           | 0.21                                    | 100 (2/2)                                                |
| BCAC   | chr2:11154272-29192809 (18.0 Mb)   | Del                       | 0.084                    | CGC TSGs <i>DNMT3A</i> and <i>ASXL2</i> are in this region                                    | 0.12                                    | 100 (3/3)                                                |
| BCAC   | chr 5q                             | Del                       | 0.097                    | No mutations in CGC genes in samples with 5q deletion. <i>APC</i> and <i>FBXW11</i> are on 5q | N/A                                     | 100 (2/2)                                                |
| BCAC   | chr 16q                            | Del                       | 8.6xe-07                 | <i>CYLD</i> (a CGC TSG) mutations found in 2 cases with 16q deletion (PD56541a, PD56543a)     | N/A                                     | 100 (4/4)                                                |

**Supplementary Table 6: Selected germline variants in patients with salivary gland basal cell adenoma (BCA) and basal cell adenocarcinoma (BCAC).** Variants were identified in mismatch repair genes (*MSH6*, *PMS2* and *MSH2*) and *BRCA* genes. The genomic position is relative to the reference genome GRCh38. The rsID is the dbSNP (v155) rsID; gnomAD AF is the total population allele frequency of the variant in the gnomAD (v3.1) database; ClinVar interpretation is the ClinVar database (release 20230121) clinical significance of the variant on disease; Impact is the Variant Effect Predictor (v103) predicted effect of the variant on the protein; COSMIC variant indicates whether the variant has been reported in the COSMIC database (v97); Sample is the BCA or BCAC sample with the variant; Somatic mutation rate is the tumour mutation burden given in mutations/Mb; CA-SG-type is carcinoma of salivary gland type (lung, unknown origin). Variants in the genes below with a ClinVar clinical significance of 'benign' or 'likely benign' were excluded.

| Gene         | Genomic position        | Amino acid change | rsID         | gnomAD AF | ClinVar interpretation                       | Impact   | COSMIC variant            | Sample                     | Somatic mutation rate (mut./Mb) |
|--------------|-------------------------|-------------------|--------------|-----------|----------------------------------------------|----------|---------------------------|----------------------------|---------------------------------|
| <i>MSH6</i>  | 2:47798646 (A>C)        | p.E221D           | rs41557217   | 6.3e-04   | Conflicting interpretations                  | Moderate | COSV52286342 (2 samples)  | PD52394b (BCA)             | 0.33                            |
| <i>MSH6</i>  | 2:47806641 (C>T)        | p.R1331*          | rs267608094  | 6.6e-06   | <b>Pathogenic</b>                            | High     | COSV52278149 (3 samples)  | PD56520b (BCA)             | 0.44                            |
| <i>PMS2</i>  | 7:5986883 (G>A)         | p.R628*           | rs63750451   | N/A       | <b>Pathogenic</b>                            | High     | N/A                       | PD52405b (BCA)             | 0.52                            |
| <i>MSH2</i>  | 2:47463105 (C>G)        | p.D487E           | rs35107951   | 9.8e-05   | Conflicting interpretations                  | Moderate | N/A                       | PD56518b (BCA)             | 0.25                            |
| <i>BRCA1</i> | 17:43057062 (T>TG INS)  | p.Q1777Pfs*74     | rs80357906   | 5.3e-05   | <b>Pathogenic</b>                            | High     | N/A                       | PD56541b (BCAC/CA-SG-type) | 2.3                             |
| <i>BRCA1</i> | 17:43092848 (GTT>G DEL) | p.K894Tfs*8       | rs8035797    | 6.6e-06   | <b>Pathogenic</b>                            | High     | COSV99066399 (2 samples)  | PD56542d (BCAC)            | 0.46                            |
| <i>BRCA2</i> | 13:32337456 (T>C)       | p.I1034T          | rs545974734  | 1.3e-05   | Uncertain significance                       | Moderate | N/A                       | PD52386b (BCA)             | 0.21                            |
| <i>BRCA2</i> | 13: 32363253 (A>G)      | p.K2684R          | rs80359043   | N/A       | Uncertain significance                       | Moderate | N/A                       | PD52386b (BCA)             | 0.21                            |
| <i>BRCA2</i> | 13:32376724 (G>A)       | p.R2896H          | rs80359128   | 6.6e-06   | Conflicting interpretations of pathogenicity | Moderate | COSV66452365 (2 samples)  | PD56518b (BCA)             | 0.25                            |
| <i>TSC1</i>  | 19:132903668 (C>A)      | p.E731*           | rs397514820  | N/A       | <b>Pathogenic</b>                            | High     | N/A                       | PD52410b (BCA)             | 0.25                            |
| <i>EP300</i> | 22:41169525 (G>A)       | p.D1399N          | rs1057519889 | N/A       | <b>Likely pathogenic</b>                     | Moderate | COSV54326888 (54 samples) | PD56520b (BCA)             | 0.44                            |

## Supplementary Methods

The following sections provide additional details to those provided in the Methods in the main text.

### Additional methods for transcriptome sequencing quality control

To select samples for a high-quality analysis cohort, we discarded any samples that reported: expression profiling efficiency < 40%; 3' bias < 0.3 or 3' bias > 0.5; proportion of reads intersecting rRNAs > 2.5%; < 20x10<sup>7</sup> read pairs; a higher sum total of low quality, ambiguous and multi-aligned reads than total reads counted; or number of genes with five counts or more < 14 x10<sup>3</sup>.

### Additional methods for cgpCaVEMan variant calling and flagging

Below are cgpCaVEMan parameters for tumours with matched normal samples:

```
-reference
$REF_BASE/GRCh38_full_analysis_set_plus_decoy_hla.fa.fai \
-outdir $OUTDIR \
-tumour-bam $TUM_BAM \
-normal-bam $NORM_BAM \
-ignore-file $REF_BASE/genome.gap.tab \
-tum-cn-default 5 \
-norm-cn-default 2 \
-species Human \
-species-assembly GRCh38 \
-flag-bed-files $REF_BASE/caveman/flagging \
-germline-indel $GERM_INDEL \
-unmatched-vcf $REF_BASE/caveman/unmatched_vcf_dir \
-seqType exome \
-tumour-protocol WSX \
-normal-protocol WSX \
-normal-contamination 0.1 \
-noflag \
-flagConfig $REF_BASE/caveman/flag.vcf.config.ini \
-flagToVcfConfig $REF_BASE/caveman/flag.to.vcf.convert.ini \
-threads $CPU_TO_USE
```

cgpCaVEMan flagging was run after casmsmartphase was used to identify MNVs, as described in the Methods in the main text. The following parameters were used for flagging:

```
cgpFlagCaVEMan.pl \
--input $VCF_IN \
--outFile $VCF_OUT \
--species Human \
--reference \
--studyType WXS \
```

```

--tumBam $TUM_BAM \
--normBam $NORM_BAM \
--bedFileLoc $REF_BASE/caveman/flagging \
--unmatchedVCFLoc $REF_BASE/caveman/unmatched_vcf_dir \
--annoBedLoc $REF_BASE/vagrent/e103 \
--flagConfig $REF_BASE/caveman/flag.vcf.config.ini
--flagToVcfConfig $REF_BASE/caveman/flag.to.vcf.convert.ini

```

The `--annoBedLoc` option had to be provided for the script to run, however, we used Ensembl VEP (v103; see main Methods and below) to predict variant consequences.

Additional parameters, flags and BED files applied to the SNV and MNV calling and flagging in the `flag.vcf.config.ini` file were as follows:

```

[HUMAN_WXS_PARAMS]
keepSW=0
minAnalysedQual=11
maxMatchedNormalAlleleProportion=0.03
maxPhasingMinorityStrandReadProportion=0.04
readPosBeginningOfReadIgnoreProportion=0.08
readPosTwoThirdsOfReadExtendProportion=0.08
pentamerMinPassAvgQual=20
samePosMaxPercent=80
maxTumIndelProportion=10
maxNormIndelProportion=10
minPassAvgMapQual=21
minPassPhaseQual=30
minDepthQual=30
minNormMutAllelequal=30
minRdPosDepth=8
vcfUnmatchedMinMutAlleleCvg=3
vcfUnmatchedMinSamplePct=5
matchedNormalMaxMutProportion=0.20
minSingleEndCoverage=10
depthCutoffProportion=0.5
maxCavemanMatchedNormalProportion=0.2
withinXBpOfDeletion=10
minGapPresentInReads=20
minMeanMapQualGapFlag=10
minGapFlagDistEndOfReadPercent=75
maxGapFlagDistFromEndOfReadProp=0.13

```

```

[HUMAN_WXS_FLAGLIST]
flagList=<<LST
depthFlag
readPositionFlag
matchedNormalFlag
pentamericMotifFlag

```



avgMapQualFlag  
centromericRepeatFlag  
codingFlag  
snpFlag  
phasingFlag  
tumIndelDepthFlag  
sameReadPosFlag  
hiSeqDepthFlag  
annotationFlag  
unmatchedNormalVcfFlag  
singleEndFlag  
matchedNormalProportion  
alignmentScoreReadLengthAdjustedFlag  
clippingMedianFlag  
alnScoreMedianFlag  
cavemanMatchNormalProportionFlag  
withinGapRangeFlag  
LST

[HUMAN\_WXS BEDFILES]  
centromericRepeatBed=centromeric\_repeats.bed.gz  
simpleRepeatBed=simple\_repeats.bed.gz  
snpBed=snp.bed.gz  
annotatableBed=gene\_regions.bed.gz  
codingBed=codingexon\_regions.sub.bed.gz  
germlineIndelBed=germline\_indel.bed  
highSeqDepthBed=genome.tab.gz

The centromeric\_repeats.bed and simple\_repeats.bed files were generated using the UCSC Table Browser, as described here:

<https://www.ncbi.nlm.nih.gov/pmc/articles/PMC6097606/#S16>  
<https://www.ncbi.nlm.nih.gov/pmc/articles/PMC6097605/#S14>

except GRCh38 was used instead of GRCh37.

The codingBed and annotatableBed files were not used, as we were not using VAGrENT to annotate the variant calls.

The snp.bed.gz file contains a manually curated list of SNPs from dbSNP. The SNPs were manually curated to remove oncogenic variants.

The genome.tab.gz file contains regions with extreme sequencing depth (more than 8 standard deviations from the mean depth in an internal reference set of BAMs), which are excluded from variant calling. Genic regions are excluded from the genome.tab.gz file.

Germline indels were not used for filtering, however, a non-empty BED file was required. Therefore, a tab-delimited BED file with "1 0 1" was used as input.

An unmatched normal panel consisting of sequencing data from normal tissue of 98 individuals was used to filter both polymorphisms and artefacts that occur from sequencing and read alignment artefacts, using the `--unmatchedNormalVcfFlag` option. Generation of this panel is described here:

<https://www.ncbi.nlm.nih.gov/pmc/articles/PMC6097605/>).

A detailed description of CaVEMan flags is available here:

<https://github.com/cancerit/cgpCaVEManPostProcessing/wiki/flags-and-settings>

To identify MNVs, adjacent SNVs were first extracted from VCF files generated by cgpCaVEMan using the `casmsmartphase` (v0.1.8) 'generate-bed' utility (<https://github.com/cancerit/CASM-Smart-Phase/releases/tag/0.1.8>) with the `--markhz` option to generate a BED file for SmartPhase. SmartPhase was run with the parameters: `-m 0 -x -g adjacent_snvs.bed`. The `casmsmartphase` 'merge-mnvs' utility was then used to select MNVs by selecting adjacent MNVs with the *cis* phasing and a minimal confidence score cutoff of 0.1 (`--exclude 30 --cutoff 0.1`) and produce a modified cgpCaVEMan VCF file with MNVs merged into a single VCF entry. Adjacent homozygous SNVs identified by 'generate-bed' were also merged into MNVs. Variants were flagged using the `cgpCavemanpostprocessing` (v1.10) `cgpFlagCaVEMan.pl` utility using 'WXS' mode for exomes.

### **Additional methods for cgpPindel variant calling and flagging**

The following parameters were used to run `cgpPindel`:

```
-o $WORK/$pair \
-r $REF_BASE/GRCh38_full_analysis_set_plus_decoy_hla.fa \
-t $TUM_BAM \
-n $NORM_BAM \
-s $REF_BASE/pindel/simpleRepeats.bed.gz \
-f $REF_BASE/pindel/WSX_Rules.lst \
-g $REF_BASE/vagrent/e${ENSM_VER}/codingexon_regions.indel.bed.gz \
-u $REF_BASE/pindel/pindel_np.v5.gff3.gz \
-st WXS \
-e chrUn%,HLA%,%_alt,%_random,chrM,chrEBV \
-b $REF_BASE/shared/HiDepth_mrg1000_no_exon_coreChrs_v3.bed.gz \
-sf $REF_BASE/pindel/softRulesFragment.lst \
-noflag
-c $CPU_TO_USE
```

The `HiDepth_mrg1000_no_exon_coreChrs_v3.bed.gz` file is the same as the `genome.gap.tab.gz` file described above, but the former has 1-based start positions, and the later has 0-based start positions.

The `pindel_np.v5.gff.gz` file consists of indels found in a panel of unmatched normal samples used to filter out polymorphisms and artefacts from sequencing and read mapping mis-alignment. The generation of this file is described here:

<https://www.ncbi.nlm.nih.gov/pmc/articles/PMC6097606/#S16>

Although `VAGrENT` annotation was not used for consequence annotation in this study, a `codingexon_regions.indel.bed.gz` file must be provided for flagging. The file was created from Ensembl v103 genes models, as described here:

<https://currentprotocols.onlinelibrary.wiley.com/doi/10.1002/0471250953.bi1508s52>.

The flagging rules (`WXS_Rules.lst` file) applied to the indel calls were as follows:

```
FF001
FF002
FF003
FF004
FF005
FF006
FF007
FF019
FF020
```

The definitions of these flags are available here:

<https://github.com/cancerit/cgpPindel/wiki/VcfFilters>

Soft flagging with `FF017` was also applied (`softRulesFragment.lst`), which indicates overlap with a simple repeat. However, variants were not hard filtered based on this flag.

To obtain library insert size statistics used as input to `cgpPindel`, `bam_stats` (v.5.6.1) was run on each sample BAM file to generate a `*.bas` file.

### Ensembl VEP options

Ensembl VEP (v103) was run to predict the impact of germline and somatic variants. The following VEP options were used:

```
--db_version 103
-t SO
--format vcf
-o $output_vcf
--cache
--dir $vep_cache_path
--buffer 20000
```

```

--species homo_sapiens
--offline
--symbol
--biotype
--vcf
--sift s
--no_stats
--assembly GRCh38
--flag_pick_allele_gene
--canonical
--hgvs
--shift_hgvs 1
--fasta GRCh38_full_analysis_set_plus_decoy_hla.fa
--compress_output bgzip
--mane
--numbers
--polyphen p
--domain
--show_ref_allele
--protein
--transcript_version
$custom

```

where

```

$custom="--custom $cosmicfile,Cosmic,vcf,exact,0,CNT --custom
$clinvarfile,ClinVar,vcf,exact,0,CLNSIG,CLNREVSTAT --custom
$dbsnpsfile,dbSNP,vcf,exact,0, --custom
$gnomadfile,gnomAD,vcf,exact,0,FLAG,AF"

```

and

\$gnomadfile is a VCF file with variants from gnomAD database release v3.1.2, with the INFO column containing only the FLAG and AF for use with VEP custom annotation. For example:

```

#CHROM    POS      ID       REF      ALT      QUAL     FILTER    INFO
chr1      10031    .        T        C        .        AC0;AS_VQSR
FLAG=AC0,AS_VQSR;AF=0
chr1      10037    .        T        C        .        AS_VQSR
FLAG=AS_VQSR;AF=2.60139e-05

```

The original VCF file were downloaded from:

<https://gnomad.broadinstitute.org/downloads>

\$clinvarfile is a VCF file from ClinVar release (dated 20230121). The file was downloaded from:



[https://ftp.ncbi.nlm.nih.gov/pub/clinvar/vcf\\_GRCh38/weekly/clinvar\\_20230121.vcf.gz](https://ftp.ncbi.nlm.nih.gov/pub/clinvar/vcf_GRCh38/weekly/clinvar_20230121.vcf.gz)

\$dbsnpfile is a VCF file with variants from dbSNP release v155. For compatibility with VEP, chromosome names were renamed from RefSeq chromosome accessions (e.g. NC\_000001.11) to chromosome numbers (e.g. chr1). The original VCF file was downloaded from:

[https://ftp.ncbi.nih.gov/snp/archive/b155/VCF/dbSNP155.GRCh38.GCF\\_000001405.39.vcf.gz](https://ftp.ncbi.nih.gov/snp/archive/b155/VCF/dbSNP155.GRCh38.GCF_000001405.39.vcf.gz)

\$cosmicfile is a VCF file with COSMIC v97 coding and non-coding variants (GRCh38, normalised), with the INFO column containing the sample counts. For example:

| #CHROM | POS   | ID           | REF | ALT | QUAL | FILTER | INFO  |
|--------|-------|--------------|-----|-----|------|--------|-------|
| chr1   | 10108 | COSV70831266 | C   | T   | .    | .      | CNT=1 |
| chr1   | 10151 | COSV70830383 | T   | A   | .    | .      | CNT=1 |
| chr1   | 10175 | COSV70830377 | T   | A   | .    | .      | CNT=1 |
| chr1   | 10181 | COSV70830549 | A   | T   | .    | .      | CNT=2 |

The original files were downloaded from <https://cancer.sanger.ac.uk/cosmic>.

### Additional details for somatic copy number analysis

The required hg38 reference files for processing WES data using ASCAT (loci, allele, GC correction and replication timing correction files) were downloaded from <https://github.com/VanLoo-lab/ascat/tree/master/ReferenceFiles/WES> (git commit ID 29f2fad). The loci and allele files were used as input to the `ascat.perpareHTS` function, along with tumour and matched normal BAM files. Other parameters used were as follows: `genomeVersion = 'hg38'`, `minCounts = 10`, `min_base_qual = 20`, `min_map_qual = 35` and `seed = 485028101` for reproducibility. A BED file containing the genomic coordinates of the exome pull-down regions sequenced was also provided, as recommended. The gender parameter was determined by the clinical data provided for each patient, and `alleleCount` (v.4.3.0; <https://github.com/cancerit/alleleCount>) was also used. The outputs of `ascat.perpareHTS` were used to run the `ascat.correctLogR` function with the reference GC and replication timing files followed by `ascat.aspcf`, which was then run with `penalty = 70` and `seed = 483024451` for reproducibility. Finally, the `ascat.runAscat` function was run using `gamma = 1` to estimate purity, ploidy and allele-specific copy number at each loci.

GISTIC2 was run with the following parameters: `-refgene hg38.UCSC.add_miR.160920.refgene.mat -genegistic 1 -smallmem 1 -broad 1 -brlen 0.75 -conf 0.95 -armpeel 1 -savegene 1 -gcm extreme -v 20 -ta 0.25 -td 0.25`. The required `hg38.UCSC.add_miR.160920.refgene.mat` file is included with the GISTIC2 package.

### **Additional details for mutational signature analysis**

`SigProfilerExtractor` performs *de novo* extraction of mutational signatures and assigns known signatures to samples by refitting known COSMIC signatures (v3.3) to the extracted signatures using `SigProfilerAssignment`. `SigProfilerExtractor` was run in exome mode using GRCh38 as the reference and opportunity genome, 500 replicates for non-negative matrix factorisation (NMF) with 1 to 10 signatures. The solution implemented for downstream analysis was the optimal solution provided by `SigProfilerExtractor` (referred to as the 'suggested solution').

### **Additional details for germline variant calling**

Variants were first called in each sample using the `GATK HaplotypeCaller` function in `ERC GVCF` mode with parameters `-G StandardAnnotation, -G StandardHCAnnotation, -G AS_StandardAnnotation`, followed by the creation of a `genomicsdb` database using `GenomicsDBImport`. Joint genotyping was then performed using `GenotypeGVCFs` using default parameters. For hard-filtering of variants, SNVs and indels were separated using the `Picard Tools (v2.27.1) SelectVariants` function and filtered using `Picard Tools (v2.27.1) VariantFiltration`. For SNVs, the following parameters were used for variant filtration: `QUAL<30.0, SOR>3.0, FS>60, MQ <40, MQRankSum < -12.5` and `ReadPosRankSum< -8.0`, and for indel filtration: `QD <2.0, QUAL <30.0, FS >200.0` and `ReadPosRankSum <-20.0`.

### **Additional details for pathogen identification using Kraken2**

`Kraken2` was executed with the following options: `--paired --gzip-compressed --use-names --confidence 0.1 --db path/to/DB --report path/to/report -report-minimizer-data --output /dev/null path/to/fastq1 path/to/fastq2`. To generate MPA-style (MetaPhlAn) outputs, the `--use-mpa-style` option was used in place of `--report-minimizer-data`.

### **Additional details for *in vitro* functional analyses**

Reagents. Dulbecco's modified Eagle's medium (DMEM), antibiotics and prestained protein SHARPMass VI markers were obtained from Euroclone (Wetherby, UK). Fetal bovine serum (FBS), and ECL Western Blotting Detection reagents were from Thermo Fisher Scientific (Waltham, MA). Phosphate-buffered saline (PBS) was purchased from Capricorn Scientific (Ebsdorfergrund, Germany). pcDNA6.2/V5-HisA eukaryotic expression vector was obtained from Invitrogen (Carlsbad, CA). The human  $\beta$ -catenin pcDNA3 plasmid was a gift from Eric Fearon (Addgene plasmid #16828; <http://n2t.net/addgene:16828>; RRID:Addgene\_16828). QuikChange II Site-Directed Mutagenesis kit was obtained from Stratagene (La Jolla, CA). Polyethylenimine (PEI) transfection reagent was purchased from Polysciences (Warrington, PA). Protease and phosphatase inhibitor cocktails and cycloheximide (CHX) were from Sigma-Aldrich (St. Louis, MO). Protein G Sepharose was obtained from GE Healthcare (Freiburg, Germany). Trans-Blot Turbo Transfer Packs were obtained from Bio-Rad Laboratories (Hercules, CA). The following antibodies were used: mouse monoclonal anti-V5 (Invitrogen);

mouse monoclonal anti- $\beta$ -catenin (Abcam, Cambridge, UK); mouse monoclonal anti-FLAG (Sigma-Aldrich), mouse polyclonal anti-polyubiquitin (Enzo Life Sciences, Farmingdale, NY); mouse monoclonal anti-GAPDH (Santa Cruz Biotechnology, Dallas TX); horseradish peroxidase conjugated anti-mouse or anti-rabbit (Thermo Fisher Scientific).

Uncropped scans for Supplementary Fig. 10.

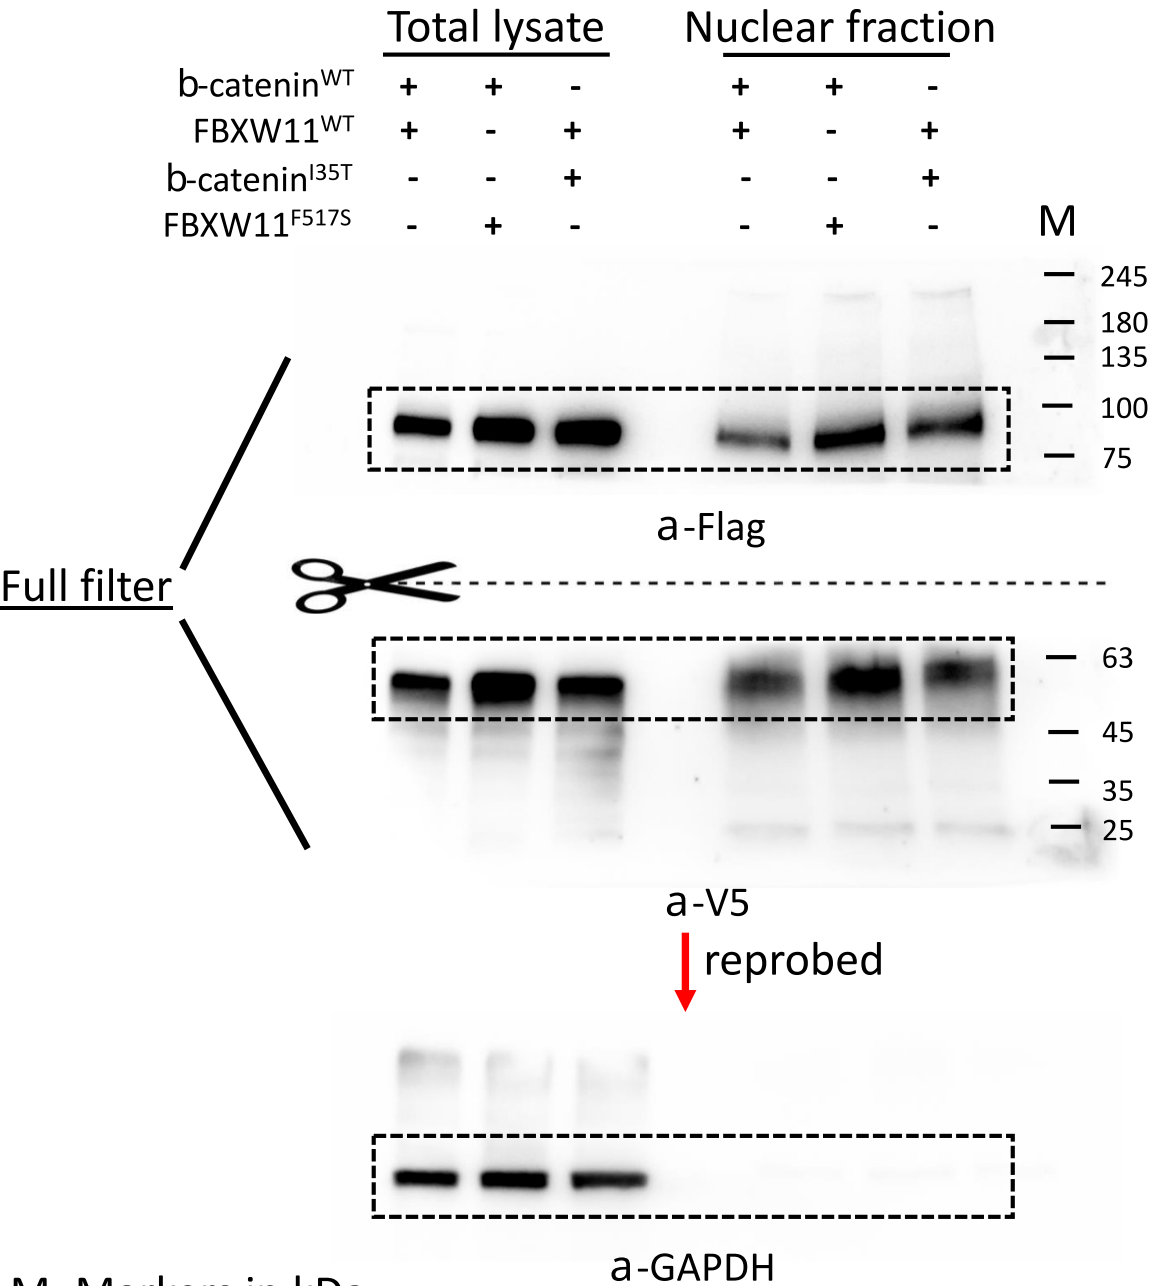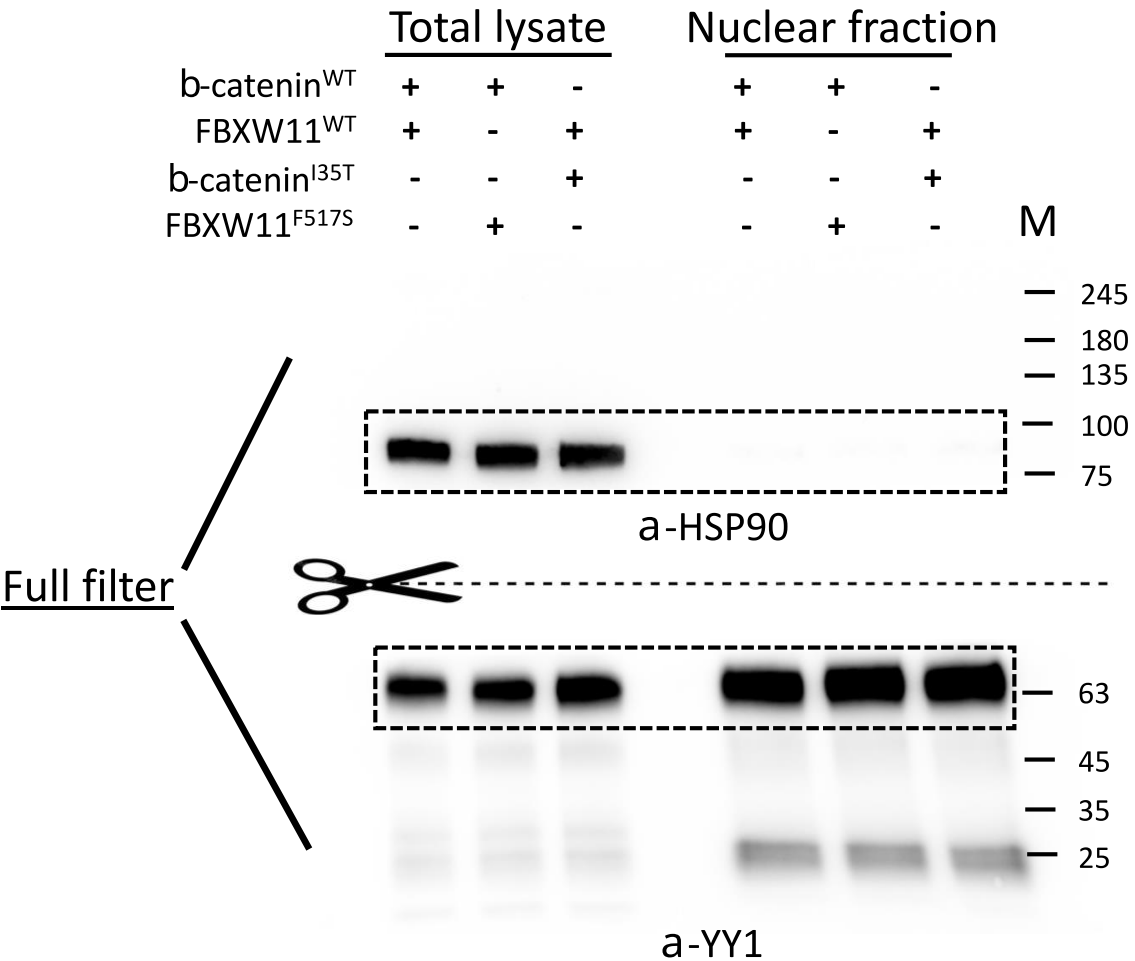

M=Markers in kDa
